# Supplementary material for: Neutral cyclic sp2–sp3 and sp3–sp3 diboranes from N,N′-dicyclohexylcarbodiimide insertion into 1,2-dichlorodiboranes(4)
Source: Royal Society of Chemistry journal article supplement (doi:10.1039/d0cc03454a), 2020-01-01
Supplement: d0cc03454a1.pdf [file d0cc03454a1.pdf]

## Electronic Supplementary Information

### Neutral cyclic $sp^2$ - $sp^3$ and $sp^3$ - $sp^3$ diboranes from N,N'-dicyclohexylcarbodiimide insertion into 1,2-dichlorodiboranes(4)

Erkan Fırıncı<sup>\*a</sup>, Rukiye Fırıncı<sup>a</sup>, Resul Sevinçek<sup>b</sup>, Muhittin Aygün<sup>b</sup>, Yüksel Şahin<sup>a</sup>

<sup>a</sup>Department of Chemistry, Science and Art Faculty, Aydın Adnan Menderes University, Aydın, Turkey. e-mail: efirinci@adu.edu.tr

<sup>b</sup>Department of Physics, Science Faculty, Dokuz Eylül University, İzmir, Turkey.

## Table of Contents

|                                        |     |
|----------------------------------------|-----|
| General Methods.....                   | S3  |
| Preparation and characterization ..... | S3  |
| Synthesis of compound 1.....           | S3  |
| Synthesis of compound 2.....           | S3  |
| Synthesis of compound 3.....           | S3  |
| NMR Spectra .....                      | S4  |
| X-Ray Crystallography.....             | S10 |
| Computational Details.....             | S10 |
| References.....                        | S50 |

## General Methods:

All reactions were performed under dry argon atmosphere using standard Schlenk techniques. All solvents were dried by applying suitable procedures.  $B_2(NMe_2)_4$ ,<sup>1</sup>  $B_2Cl_2(NMe_2)_2$ ,<sup>2</sup>  $B_2Cl_2Dur_2$  (Dur: 2,3,5,6-tetramethylphenyl)<sup>3</sup> were prepared according to literature procedures. N,N'-Dicyclohexylcarbodiimide was purchased from Sigma-Aldrich and used directly. Infrared spectra were recorded on an ATR Spectrum-II, PerkinElmer spectrometer. Elemental analyses were done on a LECO CHNS-932 by METU Central Laboratory (Ankara, Turkey). <sup>1</sup>H, <sup>11</sup>B and <sup>13</sup>C NMR spectra were recorded with a Varian 400 spectrometer in CDCl<sub>3</sub>. Residual signal of the solvent was used as reference for <sup>1</sup>H and <sup>13</sup>C NMR spectra. <sup>11</sup>B NMR spectra were referenced to external BF<sub>3</sub>.Et<sub>2</sub>O.

## Preparation and characterization:

**Synthesis of 1:** A solution of CyN=C=NCy (1.03 g, 5.0 mmol) in 10 mL toluene was slowly added to a solution of  $B_2Cl_2(NMe_2)_2$  (0.9 g, 5 mmol) in 5 mL toluene at room temperature. The mixture was stirred for 12 h. The resulting white precipitate was separated by filtration and washed with pentane. Compound **1** was obtained in 78% yield as a white powder. X-ray quality crystals were obtained from a saturated solution in CH<sub>2</sub>Cl<sub>2</sub> at -30 °C. <sup>1</sup>H NMR (400 MHz, CDCl<sub>3</sub>, ppm): 0.83-3.08 (m, 20H, Cy-CH<sub>2</sub>), 2.81 (s, 3H, B-NCH<sub>3</sub>), 2.85 (s, 3H, C-NCH<sub>3</sub>), 2.85 (s, 3H, C-NCH<sub>3</sub>), 3.03 (s, 3H, B-NCH<sub>3</sub>), 3.51 (m, 2H, Cy-CH); <sup>13</sup>C NMR (100 MHz, CDCl<sub>3</sub>, ppm): 25.3 (Cy-CH<sub>2</sub>), 25.4 (Cy-CH<sub>2</sub>), 26.7 (Cy-CH<sub>2</sub>), 27.1 (Cy-CH<sub>2</sub>), 31.6 (Cy-CH<sub>2</sub>), 33.2 (Cy-CH<sub>2</sub>), 41.1 (B-NCH<sub>3</sub>), 41.6 (C-NCH<sub>3</sub>), 42.4 (B-NCH<sub>3</sub>), 59.5 (Cy-CH), 59.9 (Cy-CH), 173.5 (N-C(NMe<sub>2</sub>)-N); <sup>11</sup>B NMR (128 MHz, CDCl<sub>3</sub>, ppm): 2.8 (Cl<sub>2</sub>-B-NCy), 41.6 (Me<sub>2</sub>N-B-NCy); Elem. Anal. Calcd. (%) for C<sub>17</sub>H<sub>34</sub>B<sub>2</sub>Cl<sub>2</sub>N<sub>4</sub>: C, 52.76; H, 8.86; N, 14.48; Found: C, 52.61; H, 8.53; N, 14.61; crystal data:  $M_r = 387.00$ ;  $0.517 \times 0.365 \times 0.307$  mm; orthorhombic; space group  $P2_12_12_1$ ;  $a = 9.1674(7)$ ,  $b = 10.6202(9)$ ,  $c = 22.2091(16)$  Å,  $V = 2162.3(3)$  Å<sup>3</sup>,  $Z = 4$ ,  $\rho_{calc} = 1.189$  g/cm<sup>3</sup>, MoK $\alpha$  radiation ( $\lambda = 0.71073$  Å),  $T = 294$  K,  $2\theta$  range for data collection = 6.71-51.358°, reflections collected 4857, independent reflections 3563,  $R_{int} = 0.0271$ , final  $R$  indexes [ $I \geq 2\sigma(I)$ ]:  $R_1 = 0.0431$ ,  $wR_2 = 0.0806$ .

**Synthesis of 2:** A solution of CyN=C=NCy (0.41 g, 5.0 mmol) in 10 mL toluene was slowly added to a solution of  $B_2Cl_2Dur_2$  (0.71 g, 2 mmol) in 5 mL toluene at room temperature. The mixture was stirred for 12 h. The resulting yellow precipitate was separated by filtration and washed with pentane. Compound **2** was obtained in 71% yield as a yellow solid. X-ray quality crystals were obtained from a saturated solution in CH<sub>2</sub>Cl<sub>2</sub> at -30 °C. <sup>1</sup>H NMR (400 MHz, CDCl<sub>3</sub>, ppm): 0.65-2.81 (m, 20H, Cy-CH<sub>2</sub>), 2.16 (s, 12H, Dur-CH<sub>3</sub>), 2.20 (s, 6H, Dur-CH<sub>3</sub>), 2.29 (s, 6H, Dur-CH<sub>3</sub>), 3.46 (m, 2H, Cy-CH), 6.84 (s, 1H, Dur-p-H), 7.15 (s, 1H, Dur-p-H); <sup>13</sup>C NMR (100 MHz, CDCl<sub>3</sub>, ppm): 18.8 (Dur-CH<sub>3</sub>), 19.1 (Dur-CH<sub>3</sub>), 19.6 (Dur-CH<sub>3</sub>), 20.0 (Dur-CH<sub>3</sub>), 21.4 (Dur-CH<sub>3</sub>), 23.0 (Dur-CH<sub>3</sub>), 24.1 (Dur-CH<sub>3</sub>), 25.1 (Cy-CH<sub>2</sub>), 26.2 (Cy-CH<sub>2</sub>), 27.8 (Cy-CH<sub>2</sub>), 30.4 (Cy-CH<sub>2</sub>), 32.2 (Cy-CH<sub>2</sub>), 32.8 (Cy-CH<sub>2</sub>), 63.0 (Cy-CH), 122.9 (Dur), 124.8 (Dur), 129.5 (Dur), 130.3 (Dur), 131.0 (Dur), 133.0 (Dur), 134.0 (Dur), 138.9 (Dur), 142.1 (Dur), 159.1 (N-C(Dur)-N); <sup>11</sup>B NMR (128 MHz, CDCl<sub>3</sub>, ppm): 3.1 (Cl<sub>2</sub>-B-NCy), 67.0 (Dur-B-NCy); Elem. Anal. Calcd. (%) for C<sub>33</sub>H<sub>48</sub>B<sub>2</sub>Cl<sub>2</sub>N<sub>2</sub>: C, 70.12; H, 8.56; N, 4.96; Found: C, 70.38; H, 8.58; N, 4.81; crystal data:  $M_r = 565.25$ ;  $0.225 \times 0.095 \times 0.087$  mm; monoclinic; space group  $P2_1/n$ ;  $a = 10.335(3)$ ,  $b = 22.822(7)$ ,  $c = 13.912(4)$  Å,  $\beta = 102.12(3)$ ,  $V = 3208.0(17)$  Å<sup>3</sup>,  $Z = 4$ ,  $\rho_{calc} = 1.17$  g/cm<sup>3</sup>, MoK $\alpha$  radiation ( $\lambda = 0.71073$  Å),  $T = 293(2)$  K,  $2\theta$  range for data collection = 5.736-49.426°, reflections collected 10635, independent reflections 5424,  $R_{int} = 0.1917$ , final  $R$  indexes [ $I \geq 2\sigma(I)$ ]:  $R_1 = 0.0956$ ,  $wR_2 = 0.1098$ .

**Synthesis of 3:** A solution of CyN=C=NCy (1.03 g, 5.0 mmol) in 10 mL toluene was slowly added to a solution of  $B_2Cl_2(NMe_2)_2$  (0.45 g, 2.5 mmol) in 5 mL toluene at room temperature. The mixture was stirred for 12 h. The resulting white precipitate was separated by filtration and washed with pentane. Compound **3** was obtained in 74% yield as a white powder. X-ray quality crystals were obtained from a saturated solution in CH<sub>2</sub>Cl<sub>2</sub> at -30 °C. <sup>1</sup>H NMR (400 MHz, C<sub>6</sub>D<sub>6</sub>, ppm): 0.87-1.95 (m, 40H, Cy-CH<sub>2</sub>), 2.33 (s, 12 H, C-NCH<sub>3</sub>), 3.29 (m, 4H, Cy-CH); <sup>13</sup>C NMR (100 MHz, C<sub>6</sub>D<sub>6</sub>, ppm): 26.2 (Cy-CH<sub>2</sub>), 27.4 (Cy-CH<sub>2</sub>), 33.7 (Cy-CH<sub>2</sub>), 40.0 (C-NCH<sub>3</sub>), 40.9 (C-NCH<sub>3</sub>), 58.5 (Cy-CH), 170.5 (N-C(NMe<sub>2</sub>)-N); <sup>11</sup>B NMR (128 MHz, C<sub>6</sub>D<sub>6</sub>, ppm): 6.1 (Cl-B-(NCy)<sub>2</sub>). Elem. Anal. Calcd. (%) for C<sub>30</sub>H<sub>56</sub>B<sub>2</sub>Cl<sub>2</sub>N<sub>6</sub>: C, 60.73; H, 9.51; N, 14.16; Found: C, 60.77; H, 9.38; N, 14.01; crystal data:  $M_r = 593.32$ ;  $0.393 \times 0.319 \times 0.283$  mm; tetragonal; space group  $I4_1cd$ ;  $a = 17.6380(16)$ ,  $b = 17.6380(16)$ ,  $c = 24.541(3)$  Å,  $V = 7634.6(16)$  Å<sup>3</sup>,  $Z = 4$ ,  $\rho_{calc} = 1.189$  g/cm<sup>3</sup>, MoK $\alpha$  radiation ( $\lambda = 0.71073$  Å),  $T = 295$  K,  $2\theta$  range for data collection = 6.534-50.038°, reflections collected 5667, independent reflections 2016,  $R_{int} = 0.1050$ , final  $R$  indexes [ $I \geq 2\sigma(I)$ ]:  $R_1 = 0.0476$ ,  $wR_2 = 0.0887$ .

## NMR Spectra:

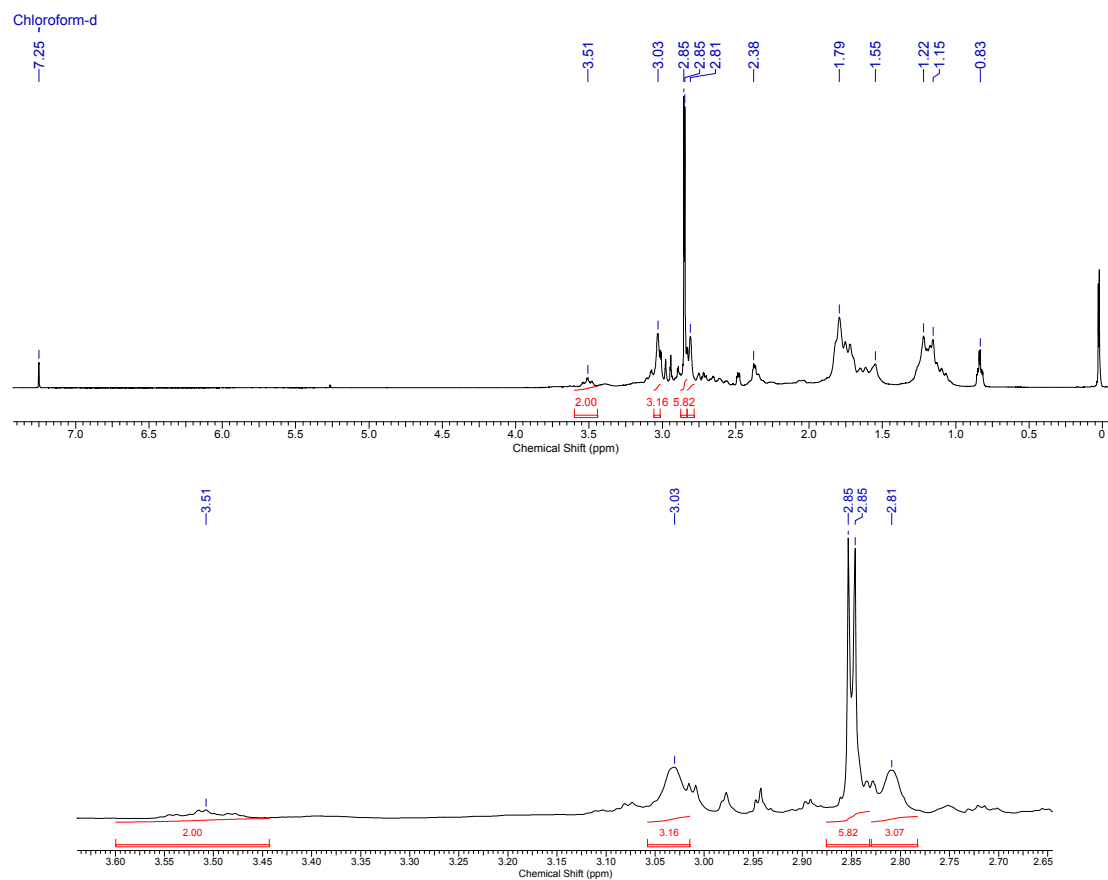

Fig. S1.  $^1\text{H}$  NMR spectrum of **1**.

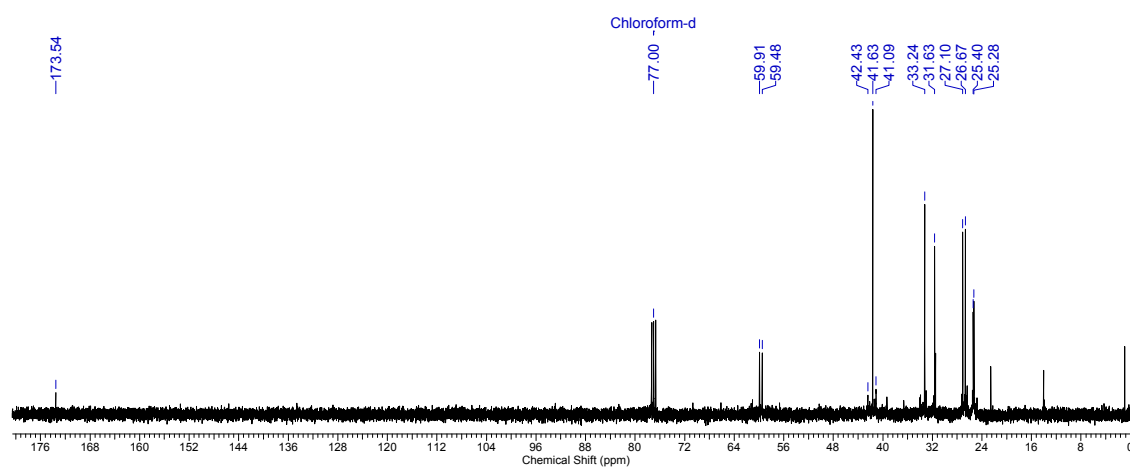

Fig. S2.  $^{13}\text{C}$  NMR spectrum of **1**.

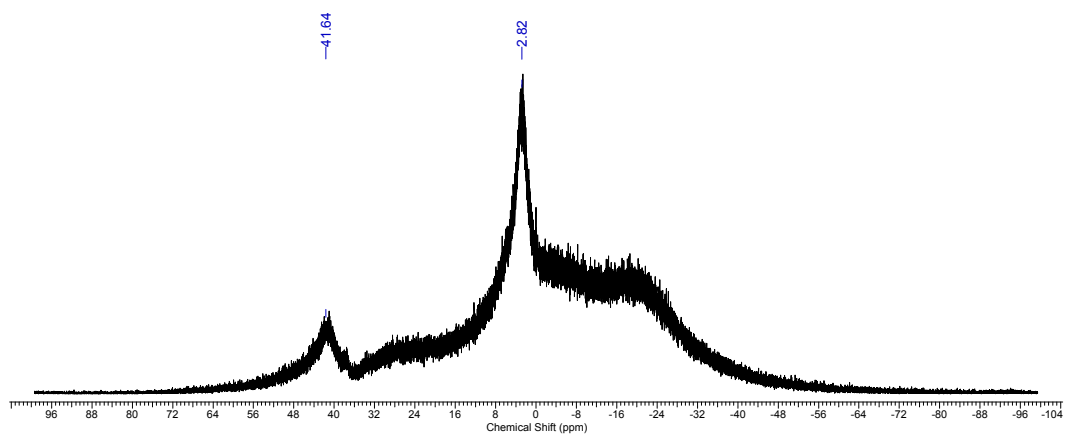

**Fig. S3.**  $^{11}\text{B}$  NMR spectrum of **1**.

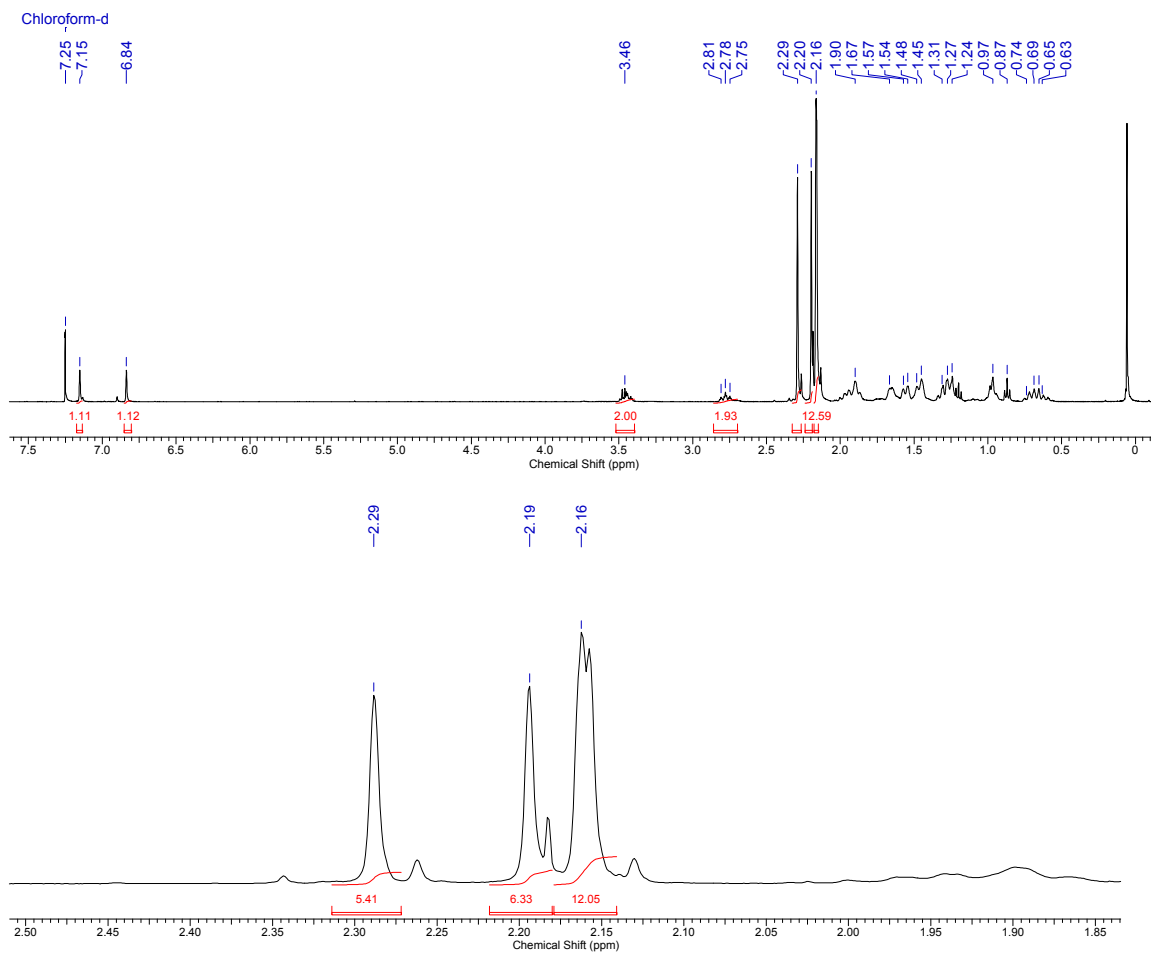

Fig. S4. <sup>1</sup>H NMR spectrum of **2**

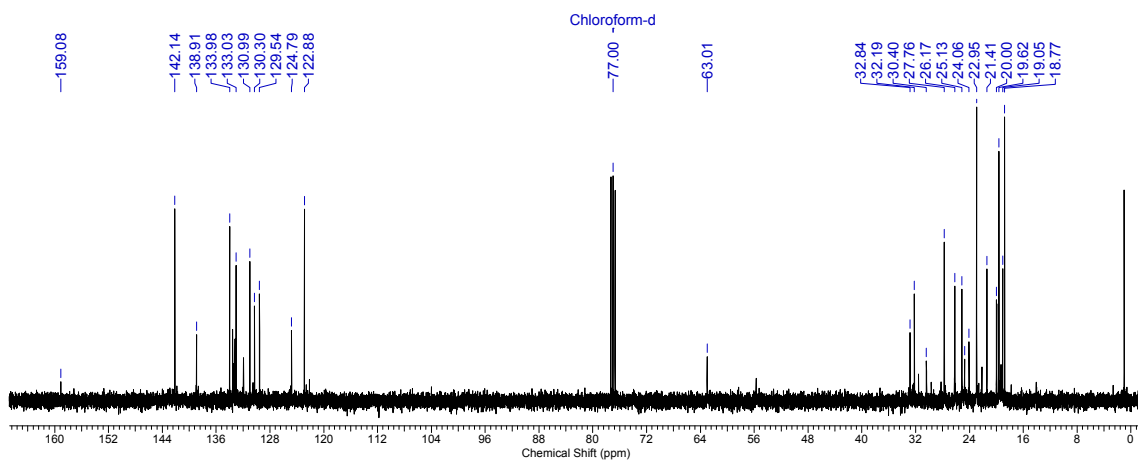

Fig. S5. <sup>13</sup>C NMR spectrum of **2**

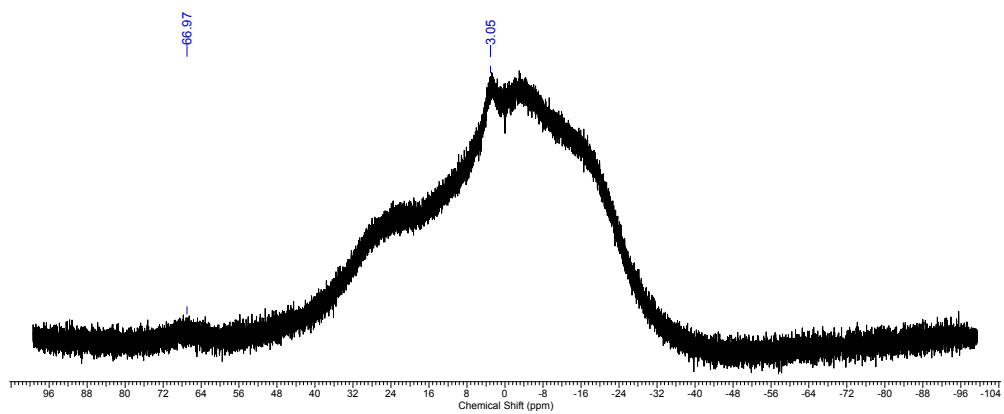

**Fig. S6.**  $^{11}\text{B}$  NMR spectrum of **2**

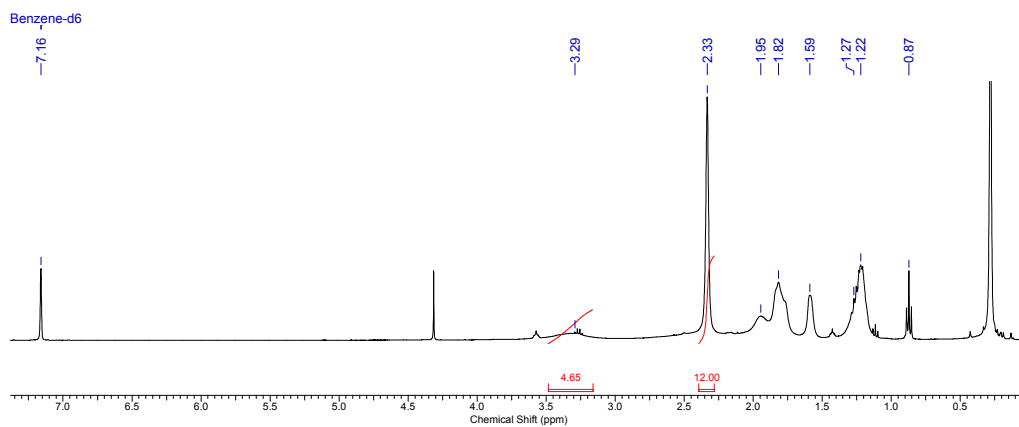

**Fig. S7.**  $^1\text{H}$  NMR spectrum of **3**

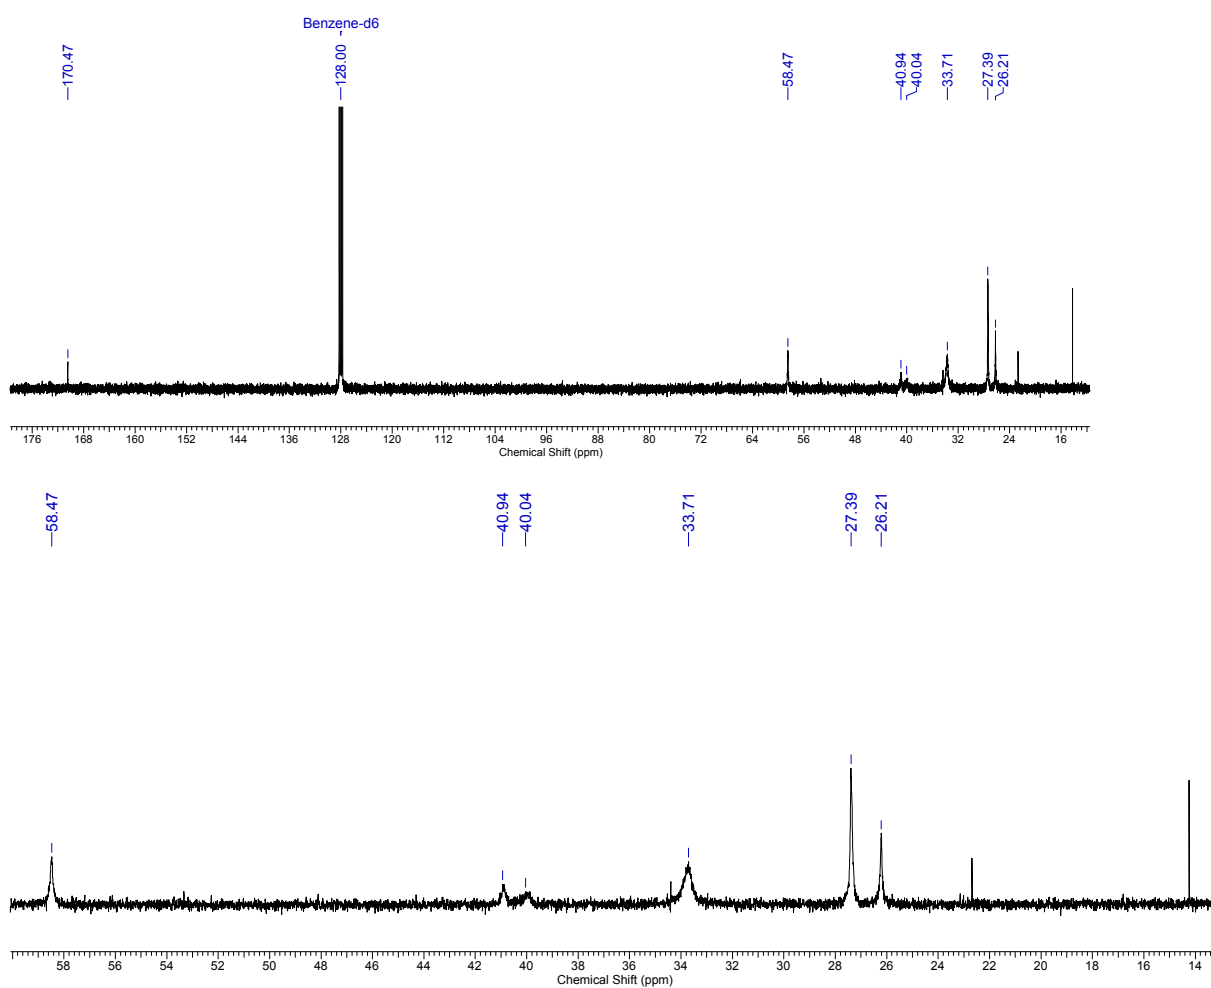

**Fig. S8.**  $^{13}\text{C}$  NMR spectrum of **3**



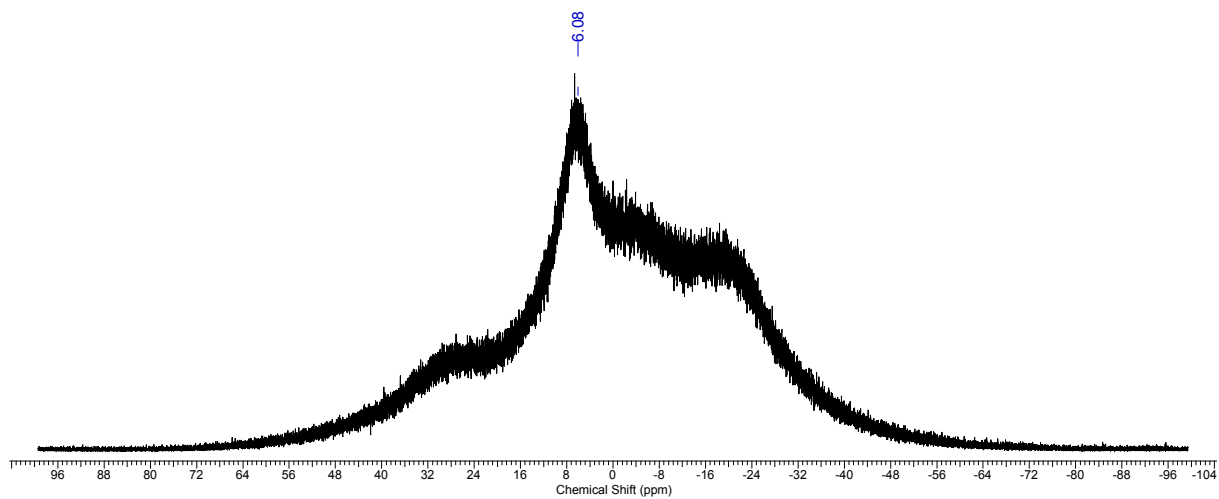

**Fig. S9.**  $^{13}\text{B}$  NMR spectrum of **3**

### X-Ray Crystallography:

The molecular structures of compounds were determined by single-crystal X-ray diffraction. Single-crystal data were collected at 293 (2) K by  $\omega$ -scan technique, on a Rigaku-Oxford Xcalibur diffractometer with an Eos CCD area detector using graphite monochromated radiation  $\text{MoK}\alpha$  ( $\lambda=0.71073 \text{ \AA}$ ) from an enhance X-ray source. The data collection, cell refinement and data reduction were performed using the CrysAlisPro program.<sup>4</sup> Solution, refinement and analysis of the structures were done using the OLEX2 system.<sup>5</sup> The crystal structures were solved with the ShelXT structure solution program using Direct Methods and refined by full-matrix least-squares method based on  $F^2$  against all reflections using the SHELXL2016.<sup>6</sup> All non-H atoms were refined anisotropically while the H atoms were placed in calculated positions and refined using a riding model. CCDC 1995325 (**1**), 1995326 (**3**) and 1995327 (**2**) contain the supplementary crystallographic data for this paper. These data are provided free of charge by The Cambridge Crystallographic Data Centre.

### Computational Details:

Quantum mechanical calculations were performed on Orca4<sup>7</sup> package program using DFT with the M06-2X<sup>8</sup> hybrid functional with the basis sets of 6-311G(d,p) for geometry optimizations, 6-311++G(2d,p)<sup>9,10</sup> for <sup>1</sup>H, <sup>11</sup>B and <sup>13</sup>C NMR calculations with the GIAO method<sup>11,12</sup>. To enlighten the reaction mechanism, transition states (TS) of the studied molecules were calculated with PM7 semiempirical methods on MOPAC2016 (Stewart, 2020) package program.<sup>13</sup> Natural Bond Orbital (NBO) analysis were performed using NBO6 program<sup>14</sup>.

**Table S1.** Selected geometric parameters of the crystal structures and optimized geometries.

|             | <b>1</b>     |            | <b>2</b>     |            | <b>3</b>     |            |
|-------------|--------------|------------|--------------|------------|--------------|------------|
|             | <b>X-ray</b> | <b>Opt</b> | <b>X-ray</b> | <b>Opt</b> | <b>X-ray</b> | <b>Opt</b> |
| B1–B2       | 1.659(6)     | 1.689      | 1.663(1)     | 1.696      | 1.652(1)     | 1.699      |
| B1–N1       | 1.560(5)     | 1.573      | 1.585(1)     | 1.574      | 1.578(7)     | 1.579      |
| B2–N2       | 1.509(5)     | 1.514      | 1.469(1)     | 1.468      | 1.563(8)     | 1.573      |
| N1–C1       | 1.330(4)     | 1.320      | 1.315(1)     | 1.316      | 1.309(7)     | 1.331      |
| N2–C1       | 1.382(4)     | 1.374      | 1.399(1)     | 1.386      | 1.343(6)     | 1.333      |
| N1–B1–B2    | 98.3(3)      | 97.5       | 98.5(7)      | 99.5       | 97.1(5)      | 97.6       |
| B1–B2–N2    | 105.1(3)     | 104.5      | 105.4(9)     | 103.0      | 103.3(6)     | 101.8      |
| N1–B1–B2–N2 | 13.9(4)      | 14.1       | -4.5(9)      | -3.3       | 16.5(5)      | 16.7       |

### Comparison of Experimental and Theoretically Calculated Results

**Table S2.** Experimentally found and calculated chemical shift values for boron and carbon atoms.

|          | <b>Exp <math>\delta_{13\text{C}}</math> (ppm)</b> | <b>Calc <math>\delta_{13\text{C}}</math> (ppm)</b> | <b>Exp <math>\delta_{11\text{B}}</math> (ppm)</b> | <b>Calc <math>\delta_{11\text{B}}</math> (ppm)</b> |
|----------|---------------------------------------------------|----------------------------------------------------|---------------------------------------------------|----------------------------------------------------|
| <b>1</b> | 173.5                                             | 171.2                                              | 2.8, 41.6                                         | 3.0, 39.8                                          |
| <b>2</b> | 159.1                                             | 175.7                                              | 3.1, 67.0                                         | 4.0, 66.6                                          |
| <b>3</b> | 170.5                                             | 170.0                                              | 6.1                                               | 8.6                                                |

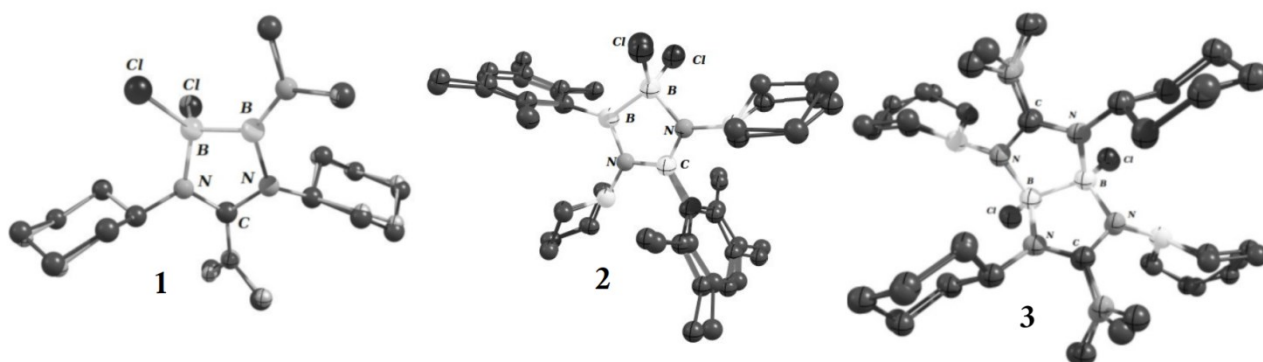

**Fig. S10.** Overlay of crystal structure and optimized geometries of the studied molecules. For clarity, H-atoms were omitted. RMSD values are 0.170Å, 0.377Å and 0.475 Å for **1**, **2** and **3**, respectively. Due to crystal structures of **2** and **3** have disordered 2 carbon atoms at one of cyclohexane groups, RMSD values are a little larger. Given RMSD values above are between optimized and main parts of the crystal structures. RMSD values between optimized and 2<sup>nd</sup> parts for **2** and **3** are 0.544 Å and 0.889 Å, respectively.

**Reaction paths and transition geometries of the studied molecules 2 and 3.**

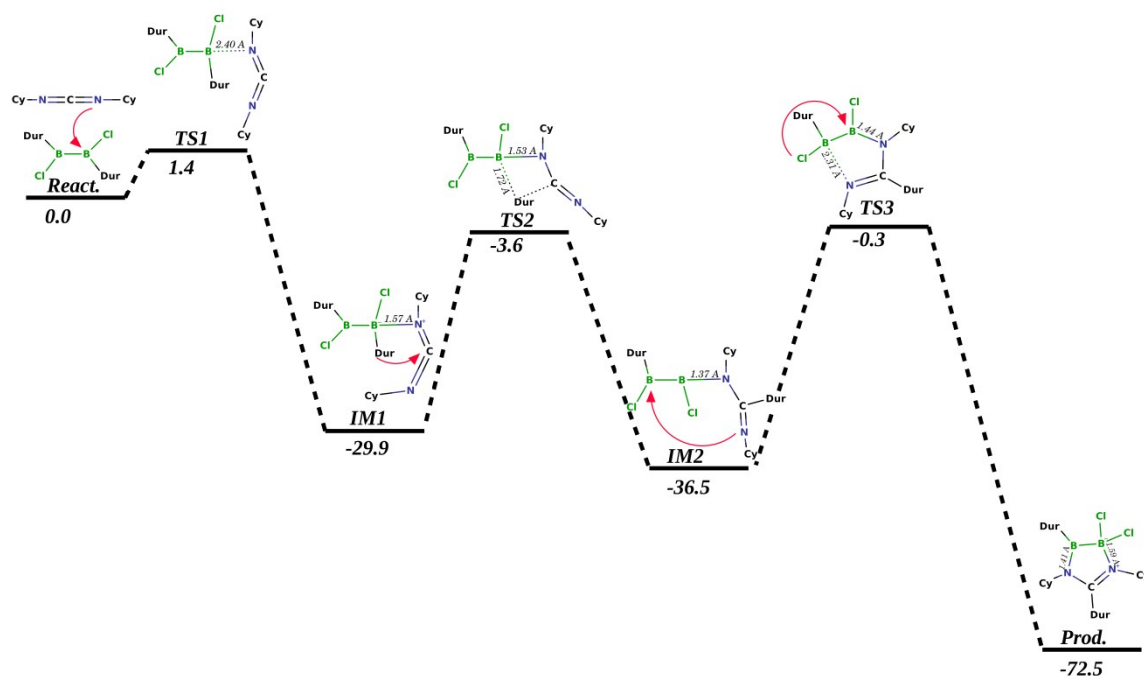

**Fig. S11.** Energy diagram of the reaction path of **2**. The calculated relative free energies are given in kcal/mol.

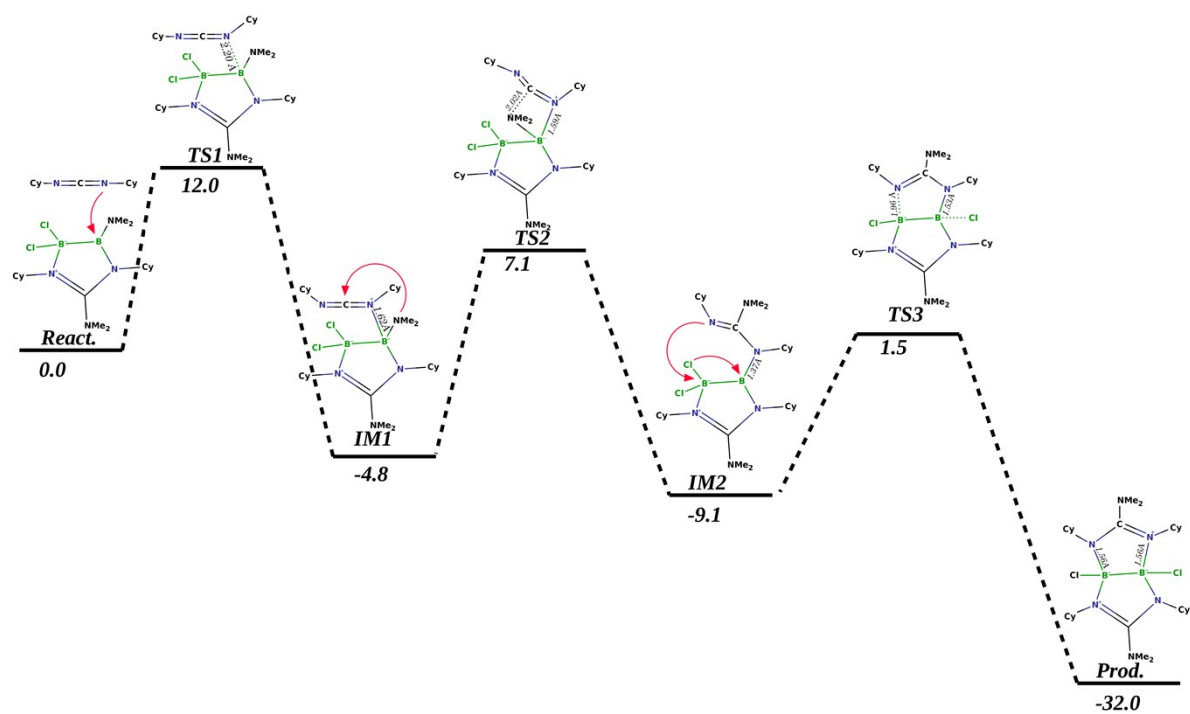

**Fig. S12.** Energy diagram of the reaction path of **3**. The calculated relative free energies are given in kcal/mol.

The computed geometries are given as follows.

Reactant 1:

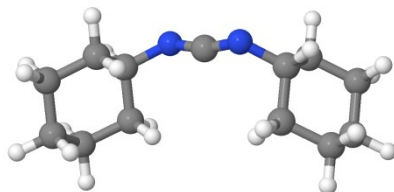

Energy: -6.2542190 kcal/mol

|   |             |             |             |
|---|-------------|-------------|-------------|
| C | -0.00006000 | -1.22201100 | -0.00027300 |
| N | -0.97679400 | -1.37985100 | 0.74444000  |
| N | 0.97665400  | -1.37928900 | -0.74513300 |
| C | 2.26430100  | -0.70442500 | -0.67618600 |
| C | 2.97296200  | -0.98552500 | 0.66742800  |
| C | 2.10707200  | 0.81812000  | -0.89441600 |
| C | 3.48457600  | 1.48748500  | -0.87203700 |
| C | 4.20125500  | 1.20577000  | 0.45507700  |
| C | 4.34449500  | -0.30495900 | 0.68209100  |
| C | -2.26432800 | -0.70469200 | 0.67591500  |
| C | -2.97327100 | -0.98535700 | -0.66763900 |
| C | -2.10681700 | 0.81777600  | 0.89447300  |
| C | -4.34469400 | -0.30456600 | -0.68191100 |
| C | -4.20117800 | 1.20608900  | -0.45455500 |
| C | -3.48421900 | 1.48736800  | 0.87250400  |
| H | 2.86840500  | -1.14346200 | -1.51856900 |
| H | 3.07845300  | -2.07687700 | 0.81464000  |
| H | 2.35504400  | -0.62485000 | 1.51022100  |
| H | 1.45886300  | 1.25221400  | -0.11228300 |
| H | 1.59980800  | 1.00850900  | -1.85819500 |
| H | 3.37703100  | 2.57771700  | -1.02190300 |
| H | 4.09792800  | 1.12490800  | -1.71844200 |
| H | 3.63963200  | 1.66161900  | 1.29192100  |
| H | 5.19617800  | 1.68653300  | 0.45897600  |
| H | 4.85082300  | -0.49779200 | 1.64620200  |
| H | 4.99685200  | -0.74514700 | -0.09551700 |
| H | -2.86837700 | -1.14381100 | 1.51828900  |
| H | -3.07896200 | -2.07666000 | -0.81508300 |
| H | -2.35542800 | -0.62458100 | -1.51045800 |
| H | -1.45868000 | 1.25195500  | 0.11231700  |
| H | -1.59935300 | 1.00787500  | 1.85820700  |
| H | -4.99698100 | -0.74482800 | 0.09569900  |
| H | -4.85122000 | -0.49708600 | -1.64597200 |
| H | -5.19602900 | 1.68700700  | -0.45816800 |
| H | -3.63962500 | 1.66205900  | -1.29139400 |
| H | -4.09748000 | 1.12469300  | 1.71892400  |
| H | -3.37647200 | 2.57754500  | 1.02260600  |

Reactant 2a:

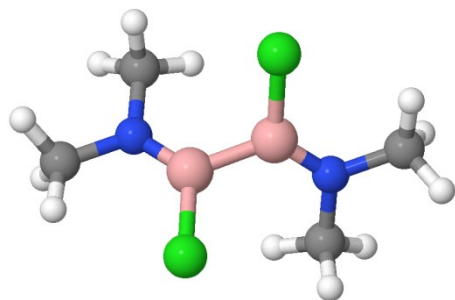

Energy: -135.4762406 kcal/mol

|    |             |             |             |
|----|-------------|-------------|-------------|
| B  | -0.78184900 | 0.29301700  | -0.09460900 |
| B  | 0.78174000  | -0.29287400 | -0.09472900 |
| Cl | -0.85206800 | 1.83894800  | -0.93491900 |
| Cl | 0.85206800  | -1.83889400 | -0.93480900 |
| N  | 1.84500100  | 0.35840500  | 0.42772100  |
| C  | 1.75849200  | 1.64363500  | 1.12064100  |
| C  | 3.22182000  | -0.12253700 | 0.31359100  |
| N  | -1.84502000 | -0.35837100 | 0.42788100  |
| C  | -1.75838200 | -1.64373100 | 1.12044100  |
| C  | -3.22189000 | 0.12247000  | 0.31363100  |
| H  | 0.79643200  | 1.76543600  | 1.65260100  |
| H  | 1.83973300  | 2.48206500  | 0.39879100  |
| H  | 2.55521200  | 1.76309400  | 1.87493100  |
| H  | 3.30740900  | -1.00028700 | -0.35551900 |
| H  | 3.61764000  | -0.42732700 | 1.29937100  |
| H  | 3.88423100  | 0.65808200  | -0.10351900 |
| H  | -0.79614200 | -1.76561300 | 1.65208100  |
| H  | -1.83979300 | -2.48213100 | 0.39862100  |
| H  | -2.55482200 | -1.76326100 | 1.87510100  |
| H  | -3.30725900 | 1.00138000  | -0.35394900 |
| H  | -3.61848900 | 0.42534100  | 1.29976100  |
| H  | -3.88372100 | -0.65764900 | -0.10528900 |

Reactant 2b:

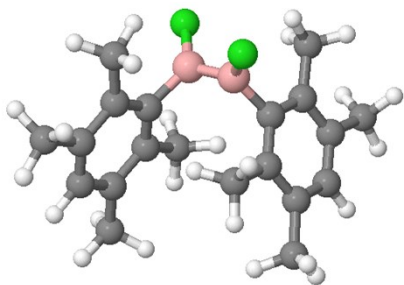

Energy: -103.9738481 kcal/mol

|    |             |             |             |
|----|-------------|-------------|-------------|
| B  | 0.37943500  | -1.42397300 | -0.69831200 |
| B  | -0.37961300 | -1.42415700 | 0.69816800  |
| Cl | -0.03489600 | -2.34430800 | 2.08535600  |
| Cl | 0.03495800  | -2.34314600 | -2.08618900 |
| C  | 1.51361700  | -0.36489900 | -0.62674300 |
| C  | 2.69505500  | -0.65584500 | 0.05237200  |
| C  | 1.28986300  | 0.87931800  | -1.22538400 |
| C  | 2.24456500  | 1.89012500  | -1.05088000 |
| C  | 3.40359300  | 1.62420000  | -0.31978200 |
| C  | 3.64566700  | 0.36242700  | 0.21933300  |
| C  | 0.06194300  | 1.10930000  | -2.04252400 |
| C  | 2.97144200  | -2.01940000 | 0.59387300  |
| C  | 4.91075800  | 0.11717700  | 0.97150400  |
| C  | 2.05267900  | 3.25614800  | -1.62180900 |
| C  | -1.28991300 | 0.87915300  | 1.22571800  |
| C  | -2.69512900 | -0.65582500 | -0.05223600 |
| C  | -3.64568000 | 0.36249900  | -0.21917400 |
| C  | -3.40354300 | 1.62422300  | 0.32003400  |
| C  | -2.24450700 | 1.89004600  | 1.05115400  |
| C  | -2.97154100 | -2.01934100 | -0.59383900 |
| C  | -0.06190700 | 1.10901700  | 2.04275800  |
| C  | -2.05255500 | 3.25604500  | 1.62212200  |
| C  | -4.91077900 | 0.11735500  | -0.97136600 |
| C  | -1.51370000 | -0.36501100 | 0.62697200  |
| H  | 4.13722300  | 2.41540900  | -0.17666200 |
| H  | -0.86427700 | 0.90687800  | -1.48027600 |
| H  | 0.05766500  | 0.47533500  | -2.94239000 |
| H  | -0.03636900 | 2.14387900  | -2.39547500 |
| H  | 2.32853200  | -2.80831000 | 0.18376500  |
| H  | 2.86381900  | -2.04071200 | 1.68960400  |
| H  | 4.00158700  | -2.33560200 | 0.36726300  |
| H  | 5.49332500  | 1.03419000  | 1.12869300  |
| H  | 5.56180600  | -0.58767300 | 0.43302300  |
| H  | 4.71183900  | -0.31064500 | 1.96499500  |
| H  | 1.12567500  | 3.71726100  | -1.24934400 |
| H  | 1.99332300  | 3.22437200  | -2.71990000 |
| H  | 2.87325700  | 3.93937600  | -1.36742600 |
| H  | -4.13713200 | 2.41546800  | 0.17694300  |
| H  | -2.86410800 | -2.04056100 | -1.68958900 |
| H  | -4.00165900 | -2.33555000 | -0.36707600 |
| H  | -2.32854000 | -2.80829000 | -0.18395300 |
| H  | 0.03418700  | 2.14245600  | 2.39960800  |
| H  | 0.86416000  | 0.91082000  | 1.47868800  |
| H  | -0.05510800 | 0.47188000  | 2.94032600  |
| H  | -2.87233300 | 3.93975100  | 1.36645300  |
| H  | -1.12475000 | 3.71657700  | 1.25095600  |
| H  | -1.99481500 | 3.22432600  | 2.72031000  |
| H  | -5.56222000 | -0.58682300 | -0.43250000 |
| H  | -4.71193800 | -0.31122400 | -1.96455400 |
| H  | -5.49288500 | 1.03454000  | -1.12922100 |

### Molecule 1 – TS1

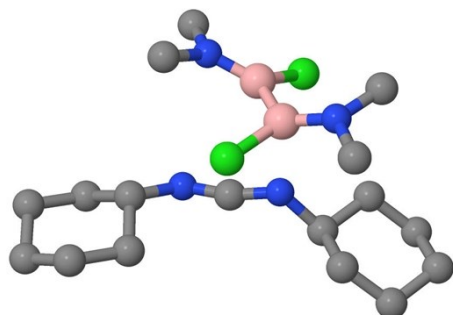

Energy: -140.26 kcal/mol

|    |             |             |             |
|----|-------------|-------------|-------------|
| C  | -0.42741500 | -0.60354600 | -0.72968700 |
| N  | -1.58851300 | -0.39398400 | -1.11209700 |
| N  | 0.78655000  | -0.53556800 | -0.43203400 |
| C  | 1.84475700  | -1.48590100 | -0.86066100 |
| H  | 1.47024600  | -2.16623400 | -1.67081200 |
| C  | 2.26631700  | -2.34177700 | 0.35208300  |
| H  | 1.41745900  | -2.96033400 | 0.69509300  |
| H  | 2.51806900  | -1.67623900 | 1.21208300  |
| C  | 3.01630900  | -0.65204000 | -1.41752300 |
| H  | 3.31060800  | 0.13177200  | -0.67952100 |
| H  | 2.68412000  | -0.08638900 | -2.30992300 |
| C  | 4.20897000  | -1.55160700 | -1.75364100 |
| H  | 5.05647700  | -0.93117300 | -2.10131800 |
| H  | 3.95358900  | -2.21718100 | -2.60072800 |
| C  | 4.63716900  | -2.39164200 | -0.54208800 |
| H  | 5.02056000  | -1.72670300 | 0.25544100  |
| H  | 5.47675700  | -3.05507800 | -0.82003900 |
| C  | 3.46656400  | -3.22578400 | -0.00268700 |
| H  | 3.78818500  | -3.79432500 | 0.89005600  |
| H  | 3.16872300  | -3.98247200 | -0.75415900 |
| C  | -2.85641500 | -0.62990400 | -0.39001500 |
| H  | -2.99408500 | 0.25448500  | 0.30754000  |
| C  | -2.85212100 | -1.93316700 | 0.43604300  |
| H  | -2.05549000 | -1.89417100 | 1.20473300  |
| H  | -2.61279000 | -2.79450400 | -0.21537900 |
| C  | -3.98314400 | -0.64175400 | -1.44326800 |
| H  | -3.79480200 | -1.43902200 | -2.18816700 |
| H  | -3.97595100 | 0.30605200  | -2.01423100 |
| C  | -4.21600200 | -2.14336900 | 1.10456700  |
| H  | -4.38964900 | -1.35197300 | 1.85948400  |
| H  | -4.21425700 | -3.09908200 | 1.66191300  |
| C  | -5.35301600 | -2.14050700 | 0.07315400  |
| H  | -6.32699300 | -2.24888300 | 0.58512500  |
| H  | -5.25599400 | -3.02039900 | -0.59173700 |
| C  | -5.34192600 | -0.85496700 | -0.76611600 |
| H  | -5.58576900 | 0.01400000  | -0.12534500 |
| H  | -6.13720400 | -0.89957700 | -1.53393400 |
| B  | 0.24634600  | 2.18016000  | -0.09626300 |
| B  | 0.79822900  | 1.17885300  | 1.10114100  |
| Cl | 1.38647700  | 2.40168200  | -1.47898700 |
| Cl | -0.49358800 | 0.28280700  | 2.03860300  |
| N  | 2.06316200  | 1.22769700  | 1.70126700  |
| C  | 3.16642900  | 1.95713300  | 1.05834700  |
| H  | 2.84393800  | 2.96997200  | 0.75603300  |
| H  | 3.51831900  | 1.42599000  | 0.14279300  |
| H  | 4.02503600  | 2.07934200  | 1.73677900  |
| C  | 2.43149100  | 0.30560500  | 2.78744600  |
| H  | 2.46034300  | -0.74777200 | 2.42523400  |
| H  | 1.69818800  | 0.35891000  | 3.61274700  |
| H  | 3.41804900  | 0.54526700  | 3.21309100  |



|   |             |            |             |
|---|-------------|------------|-------------|
| N | -0.96558300 | 2.85070600 | -0.17652700 |
| C | -1.99462000 | 2.72042100 | 0.86474700  |
| H | -1.54720500 | 2.76420800 | 1.87507300  |
| H | -2.53145300 | 1.74757200 | 0.77400800  |
| H | -2.74096300 | 3.52865000 | 0.80712100  |
| C | -1.32742900 | 3.61693600 | -1.38204800 |
| H | -2.32320300 | 4.07797000 | -1.29933300 |
| H | -1.33365700 | 2.96397600 | -2.27652900 |
| H | -0.59603000 | 4.42522900 | -1.56722200 |

Molecule 1 – IM1

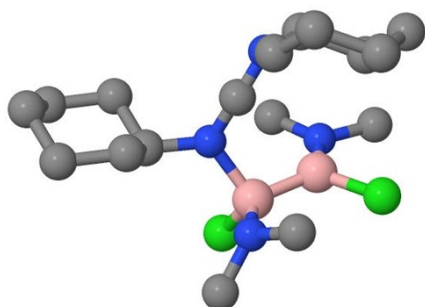

Energy: -147.96 kcal/mol

|    |             |             |             |
|----|-------------|-------------|-------------|
| C  | -0.09061100 | 0.53450300  | -0.82387800 |
| N  | -1.03565600 | -0.11696600 | -0.29180700 |
| N  | 0.79633000  | 0.98571800  | -1.53767900 |
| C  | 1.91417500  | 1.85097500  | -1.17767300 |
| H  | 2.17586800  | 2.40848900  | -2.11903400 |
| C  | 3.10441000  | 0.97044900  | -0.74288500 |
| H  | 3.35126400  | 0.23902400  | -1.53448600 |
| H  | 2.83501500  | 0.36758900  | 0.14742800  |
| C  | 1.54424900  | 2.84988800  | -0.06042900 |
| H  | 1.21914500  | 2.30587900  | 0.84897800  |
| H  | 0.68829900  | 3.47508100  | -0.37066000 |
| C  | 2.75716400  | 3.72785000  | 0.26373800  |
| H  | 2.50260100  | 4.43860900  | 1.07206800  |
| H  | 3.02441100  | 4.35023100  | -0.61039700 |
| C  | 3.95427000  | 2.86345400  | 0.68063000  |
| H  | 3.72255800  | 2.32309100  | 1.61907200  |
| H  | 4.82522800  | 3.50416100  | 0.90692900  |
| C  | 4.30892100  | 1.85954300  | -0.42410700 |
| H  | 5.16229400  | 1.23066600  | -0.10535900 |
| H  | 4.64807600  | 2.39197500  | -1.33123100 |
| C  | -2.40374800 | 0.42628500  | -0.18626300 |
| H  | -3.03605300 | -0.37451000 | 0.29256300  |
| C  | -2.96173900 | 0.74191100  | -1.58875400 |
| H  | -2.94822200 | -0.16963600 | -2.21600700 |
| H  | -2.32732800 | 1.48380700  | -2.10658900 |
| C  | -2.41566900 | 1.68141700  | 0.71007100  |
| H  | -1.75292400 | 2.46303600  | 0.30092100  |
| H  | -2.00896400 | 1.42356800  | 1.71086000  |
| C  | -4.39319900 | 1.27108200  | -1.45154500 |
| H  | -5.05027000 | 0.48483200  | -1.03211200 |
| H  | -4.80579900 | 1.50828800  | -2.44924100 |
| C  | -4.42772100 | 2.51696900  | -0.55656900 |
| H  | -5.46482000 | 2.88613100  | -0.46069100 |
| H  | -3.85707600 | 3.33798300  | -1.02857800 |
| C  | -3.84908300 | 2.20486700  | 0.82994100  |
| H  | -4.48391700 | 1.46022900  | 1.34755400  |
| H  | -3.86929700 | 3.11032400  | 1.46390900  |
| B  | -0.50768900 | -1.37116000 | 0.69197800  |
| B  | 0.85835600  | -2.10162800 | -0.08768200 |
| Cl | -1.74304700 | -2.70331700 | 0.50282000  |
| Cl | 2.30854000  | -2.21423300 | 0.90829300  |
| N  | 0.84851600  | -2.63539700 | -1.33632600 |
| C  | 2.01665400  | -3.36409200 | -1.84691800 |
| H  | 2.87412600  | -2.68044200 | -1.99217100 |
| H  | 1.81948800  | -3.86047000 | -2.81019300 |
| H  | 2.33553000  | -4.15483500 | -1.13880700 |
| C  | -0.25797800 | -2.62670000 | -2.28738100 |
| H  | -1.02452300 | -1.86949500 | -2.04448500 |
| H  | -0.77513200 | -3.60718700 | -2.28986600 |
| H  | 0.08981800  | -2.40502100 | -3.31188800 |

|   |             |             |            |
|---|-------------|-------------|------------|
| N | -0.44172900 | -0.74494200 | 2.02568700 |
| C | 0.79599000  | -0.23539800 | 2.60518500 |
| H | 1.45626000  | 0.18840500  | 1.83173400 |
| H | 1.36475200  | -1.00373000 | 3.16023700 |
| H | 0.56634800  | 0.58526000  | 3.31032000 |
| C | -1.39632700 | -1.17859800 | 3.04616400 |
| H | -2.42586600 | -1.16475300 | 2.64734500 |
| H | -1.37790100 | -0.49823400 | 3.91396300 |
| H | -1.19048500 | -2.20138900 | 3.41241900 |

Molecule 1 – TS2

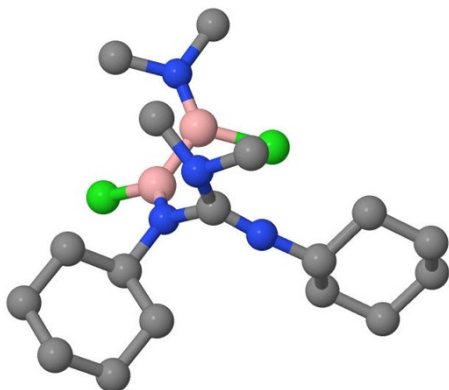

Energy: -140.00 kcal/mol

|    |             |             |             |
|----|-------------|-------------|-------------|
| C  | 0.00103900  | -0.39286500 | 0.84591300  |
| N  | 1.08772600  | -0.88018000 | 0.51482800  |
| N  | -1.02695400 | -0.14153300 | -0.16685500 |
| C  | -1.91886200 | -1.27119900 | -0.50482600 |
| H  | -2.17815800 | -1.20439000 | -1.59923500 |
| C  | -1.25220800 | -2.64148200 | -0.26416200 |
| H  | -0.98417400 | -2.76005800 | 0.80372500  |
| H  | -0.30397600 | -2.70861900 | -0.83035200 |
| C  | -3.21738500 | -1.17087900 | 0.32824800  |
| H  | -3.69785100 | -0.18708500 | 0.18076500  |
| H  | -2.97700600 | -1.24891500 | 1.40622500  |
| C  | -4.17700400 | -2.29122600 | -0.08660600 |
| H  | -4.47822500 | -2.15967200 | -1.14323300 |
| H  | -5.10813700 | -2.22751100 | 0.50498500  |
| C  | -3.52249800 | -3.66534700 | 0.10687100  |
| H  | -4.21598500 | -4.46537600 | -0.20688900 |
| H  | -3.32129500 | -3.83765900 | 1.18100900  |
| C  | -2.21374400 | -3.75568400 | -0.68903200 |
| H  | -2.42244000 | -3.68855200 | -1.77322700 |
| H  | -1.73988600 | -4.74170000 | -0.53069200 |
| C  | 2.37726900  | -1.36562900 | 0.20601000  |
| H  | 2.42023600  | -2.43939200 | 0.55192400  |
| C  | 2.61470400  | -1.31570000 | -1.32625000 |
| H  | 2.51605700  | -0.27681500 | -1.69202100 |
| H  | 1.82716900  | -1.88667600 | -1.84743100 |
| H  | 3.28836000  | -0.57250800 | 2.03352000  |
| H  | 3.39939300  | 0.51884500  | 0.65279000  |
| C  | 4.00388400  | -1.86958000 | -1.64816400 |
| H  | 4.18029700  | -1.82911300 | -2.73902900 |
| H  | 4.06700500  | -2.93726500 | -1.36962100 |
| C  | 5.08494500  | -1.06663200 | -0.91181000 |
| H  | 5.07635100  | -0.01736800 | -1.26495700 |
| H  | 6.08645400  | -1.46371400 | -1.15211900 |
| C  | 4.84815700  | -1.10614100 | 0.60403200  |
| C  | 3.46522400  | -0.54495800 | 0.94585100  |
| H  | 5.62933300  | -0.52210100 | 1.12434300  |
| H  | 4.94460900  | -2.14247600 | 0.97643600  |
| B  | -0.14467200 | 2.38219400  | -0.42962700 |
| B  | -1.10869900 | 1.06648600  | -0.79029400 |
| Cl | 1.55805100  | 2.02014400  | -0.65144000 |
| Cl | -2.26474700 | 1.44202200  | -2.05762100 |
| N  | -0.45502400 | -0.22533300 | 2.19920600  |
| C  | -1.32927400 | 0.92596700  | 2.48259700  |
| H  | -1.69987100 | 0.84185900  | 3.51955600  |
| H  | -2.21663600 | 0.90569600  | 1.82885900  |
| H  | -0.82683900 | 1.89984600  | 2.37249900  |
| C  | 0.63558900  | -0.31924900 | 3.19181300  |
| H  | 1.16736900  | -1.27844800 | 3.06056500  |

|   |             |             |             |
|---|-------------|-------------|-------------|
| H | 0.20257600  | -0.31831000 | 4.20468100  |
| H | 1.37010200  | 0.49804900  | 3.11408200  |
| N | -0.62858800 | 3.58488900  | -0.03524300 |
| C | 0.21847600  | 4.75286600  | 0.20590600  |
| H | 0.23993400  | 5.01152000  | 1.27985600  |
| H | -0.14213800 | 5.63197100  | -0.35809400 |
| H | 1.26663200  | 4.58571300  | -0.10875800 |
| C | -2.04970000 | 3.87814600  | 0.14852300  |
| H | -2.61200900 | 2.99869500  | 0.51369000  |
| H | -2.51166900 | 4.18572200  | -0.81182500 |
| H | -2.21668200 | 4.68824900  | 0.87857300  |

Molecule 1 – TS2i

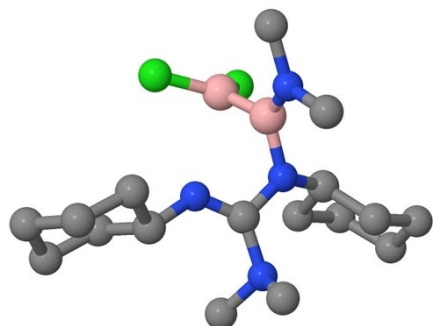

Energy: -126.41 kcal/mol

|    |             |             |             |
|----|-------------|-------------|-------------|
| C  | 0.01243500  | -0.83129100 | 0.28573600  |
| N  | -1.15575200 | -0.31250100 | 0.04645000  |
| N  | 1.04461800  | 0.07590500  | 0.46633600  |
| C  | 2.43708400  | -0.15120500 | 0.07764500  |
| H  | 2.94476500  | 0.85470000  | 0.03135000  |
| C  | 3.17301000  | -0.99890300 | 1.14435100  |
| H  | 2.72812500  | -2.01160800 | 1.18624600  |
| H  | 3.03566600  | -0.55637100 | 2.14359900  |
| C  | 2.58443200  | -0.82967100 | -1.30326300 |
| H  | 2.01249500  | -0.28563700 | -2.07220000 |
| H  | 2.15998900  | -1.85071100 | -1.26819200 |
| C  | 4.07069700  | -0.89248800 | -1.66998200 |
| H  | 4.48570100  | 0.12907600  | -1.75430400 |
| H  | 4.19435000  | -1.35556000 | -2.66536400 |
| C  | 4.84409900  | -1.69486700 | -0.61365300 |
| H  | 5.91610900  | -1.73332000 | -0.87358300 |
| H  | 4.48879700  | -2.74263500 | -0.60857300 |
| C  | 4.66000300  | -1.08108100 | 0.78218300  |
| H  | 5.11534300  | -0.07414200 | 0.81457600  |
| H  | 5.19760200  | -1.68510200 | 1.53452600  |
| C  | -2.43219700 | -0.99588900 | 0.05554300  |
| H  | -2.38125100 | -2.04602200 | 0.43574100  |
| C  | -3.37662500 | -0.18148900 | 0.97552500  |
| H  | -3.39785300 | 0.87148600  | 0.63426800  |
| H  | -2.97280100 | -0.15640700 | 2.00066600  |
| C  | -2.98413200 | -0.99888900 | -1.39110100 |
| H  | -2.30206500 | -1.55339800 | -2.05651800 |
| H  | -3.00176400 | 0.03969300  | -1.77576600 |
| C  | -4.78023500 | -0.79202600 | 0.94876500  |
| H  | -5.45662100 | -0.21090000 | 1.60124500  |
| H  | -4.75906600 | -1.81590200 | 1.36434900  |
| C  | -5.32697900 | -0.81817700 | -0.48564100 |
| H  | -5.43659100 | 0.21699000  | -0.86125200 |
| H  | -6.33773000 | -1.26180600 | -0.50009100 |
| C  | -4.38887200 | -1.60665400 | -1.41037500 |
| H  | -4.78563600 | -1.60501100 | -2.44213300 |
| H  | -4.35167400 | -2.66603400 | -1.09809800 |
| B  | 0.19928500  | 2.17730000  | -0.83675500 |
| B  | 0.58443100  | 1.51402100  | 0.62406900  |
| Cl | -1.43089600 | 2.59641500  | -1.12397700 |
| Cl | 1.42996200  | 2.40794800  | -2.01226700 |
| N  | 0.41043000  | 2.13095900  | 1.81878600  |
| C  | -0.08072200 | 3.50033500  | 1.95829500  |
| H  | -1.18714400 | 3.52747800  | 1.88317600  |
| H  | 0.32459500  | 4.16509500  | 1.17332900  |
| H  | 0.19886600  | 3.94871000  | 2.92669200  |
| C  | 0.59313400  | 1.45524400  | 3.10145600  |
| H  | 0.94610600  | 0.41334700  | 2.96065300  |
| H  | -0.35788100 | 1.40068200  | 3.66128700  |
| H  | 1.34273600  | 1.97190500  | 3.72515000  |

|   |             |             |             |
|---|-------------|-------------|-------------|
| N | 0.39167900  | -2.23059000 | 0.42372100  |
| C | -0.13954100 | -3.08969400 | -0.65135200 |
| H | -0.07510100 | -2.56493800 | -1.62029800 |
| H | -1.18054200 | -3.41650800 | -0.50887600 |
| H | 0.50273400  | -3.98653700 | -0.71205700 |
| C | 0.06946200  | -2.74297400 | 1.76959500  |
| H | 0.55227000  | -2.09680700 | 2.52326800  |
| H | 0.49519300  | -3.75509900 | 1.87462300  |
| H | -1.00755800 | -2.78756600 | 1.99273000  |

Molecule 1 – Product

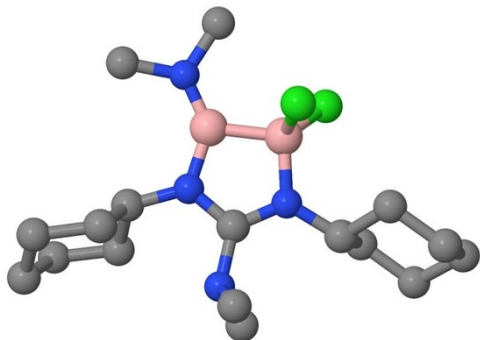

Energy: -177.98 kcal/mol

|    |             |             |             |
|----|-------------|-------------|-------------|
| C  | -0.21805100 | -0.68279800 | 0.12865100  |
| N  | -1.24730000 | 0.18891200  | -0.10167900 |
| N  | 1.01544000  | -0.14713900 | 0.09864100  |
| C  | 2.26443900  | -0.91210000 | 0.13081100  |
| C  | 3.34410900  | -0.20974000 | 0.97854100  |
| C  | 2.78792900  | -1.12690000 | -1.30905900 |
| C  | 4.02595900  | -2.02747000 | -1.25779900 |
| C  | 5.11334900  | -1.38057100 | -0.38831900 |
| C  | 4.59024900  | -1.10302100 | 1.02744100  |
| C  | -2.65780100 | -0.19497700 | -0.19964900 |
| C  | -3.22922100 | -0.65756700 | 1.15744100  |
| C  | -2.92406100 | -1.26258700 | -1.28320900 |
| C  | -4.74210100 | -0.85997600 | 1.01938100  |
| C  | -5.05168100 | -1.88169600 | -0.08449900 |
| C  | -4.43976100 | -1.44848700 | -1.42471900 |
| B  | -0.78924000 | 1.60375200  | -0.17775900 |
| B  | 0.94552000  | 1.39639100  | 0.02990100  |
| Cl | 1.95302100  | 2.12937100  | -1.25668900 |
| N  | -1.34563900 | 2.83233200  | -0.26281900 |
| C  | -2.77660900 | 3.10529300  | -0.14829900 |
| C  | -0.56380900 | 4.05007200  | -0.48485900 |
| H  | 2.07604900  | -1.91682000 | 0.59799100  |
| H  | 2.97162000  | -0.00839000 | 1.99986100  |
| H  | 3.60897000  | 0.77931000  | 0.55295100  |
| H  | 3.05063900  | -0.15514000 | -1.77389900 |
| H  | 2.00526900  | -1.55703900 | -1.95425900 |
| H  | 4.41075900  | -2.19559100 | -2.28084900 |
| H  | 3.76584800  | -3.02572000 | -0.86367900 |
| H  | 5.44669900  | -0.43228100 | -0.85407900 |
| H  | 6.00429900  | -2.03110100 | -0.34517900 |
| H  | 5.37580900  | -0.60903100 | 1.62991100  |
| H  | 4.36510900  | -2.05269100 | 1.54447100  |
| H  | -3.22028000 | 0.72936300  | -0.52114900 |
| H  | -3.00037000 | 0.08298300  | 1.94409100  |
| H  | -2.74704100 | -1.60252700 | 1.47077100  |
| H  | -2.45876100 | -2.22567700 | -1.00638900 |
| H  | -2.47168100 | -0.95415700 | -2.24167900 |
| H  | -5.23982000 | 0.10146400  | 0.79620100  |
| H  | -5.16465100 | -1.20407600 | 1.98124100  |
| H  | -6.14368100 | -2.00860600 | -0.18888900 |
| H  | -4.65382200 | -2.87310600 | 0.20343100  |
| H  | -4.91228100 | -0.51249600 | -1.77481900 |
| H  | -4.65491100 | -2.20509600 | -2.20107900 |
| H  | -3.23537900 | 3.24262300  | -1.14451900 |
| H  | -2.96718900 | 4.01780300  | 0.44659100  |
| H  | -3.31417900 | 2.29028300  | 0.37101100  |
| H  | 0.16951100  | 4.21470100  | 0.33169100  |
| H  | -1.18874800 | 4.95453200  | -0.54606900 |
| H  | 0.00992100  | 3.98595100  | -1.43146900 |



|    |             |             |             |
|----|-------------|-------------|-------------|
| N  | -0.52964100 | -2.06198800 | 0.39919100  |
| C  | -0.18849200 | -2.44362800 | 1.78450100  |
| C  | -0.01909200 | -3.00884900 | -0.60923900 |
| H  | -0.73418200 | -3.37342800 | 2.02451100  |
| H  | -0.53505100 | -1.66146800 | 2.48544100  |
| H  | 0.88490800  | -2.61048900 | 1.96704100  |
| H  | -0.15935200 | -2.59708800 | -1.62447900 |
| H  | -0.62404200 | -3.93192800 | -0.53732900 |
| H  | 1.04075800  | -3.28489900 | -0.49127900 |
| Cl | 1.24202100  | 2.11853100  | 1.66946100  |

Molecule 2 – TS1

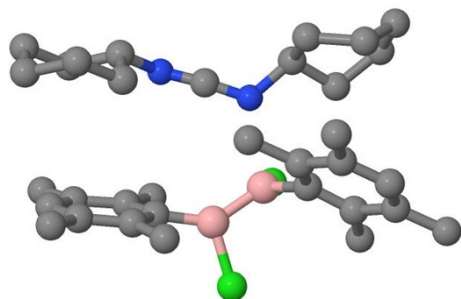

Energy: -108.80 kcal/mol

|    |             |             |             |
|----|-------------|-------------|-------------|
| B  | -0.25264000 | -1.86861100 | -0.48770000 |
| B  | 1.07809800  | -0.95320900 | -0.79116600 |
| C  | 2.22526500  | -0.91631900 | 0.26007500  |
| C  | 1.99922900  | -0.30240600 | 1.50030000  |
| C  | 3.45095600  | -1.54912300 | -0.02106900 |
| C  | 4.49735700  | -1.47252200 | 0.92397300  |
| C  | 4.28732900  | -0.80748000 | 2.13870700  |
| C  | 3.05014900  | -0.23436900 | 2.44425900  |
| C  | 0.67992300  | 0.30439100  | 1.86147000  |
| C  | 2.86664600  | 0.44463700  | 3.76635300  |
| C  | 5.84060200  | -2.08070000 | 0.66186400  |
| C  | 3.65818700  | -2.32120700 | -1.28548000 |
| Cl | 1.34133600  | -0.85276300 | -2.54522000 |
| Cl | 0.25599500  | -3.57027100 | -0.50069700 |
| C  | -1.77249700 | -1.66776700 | -0.26684500 |
| C  | -2.56151900 | -1.40884100 | -1.39692600 |
| C  | -2.32815300 | -1.85358100 | 1.00281500  |
| C  | -3.72630900 | -1.72208500 | 1.15866200  |
| C  | -4.52036100 | -1.45654500 | 0.03681400  |
| C  | -3.96034900 | -1.31174000 | -1.24061100 |
| C  | -4.37116300 | -1.87838500 | 2.49984300  |
| C  | -1.47527700 | -2.22802000 | 2.17292700  |
| C  | -1.90451800 | -1.25754200 | -2.72976000 |
| C  | -4.86553100 | -1.07412300 | -2.40906200 |
| N  | 0.72480300  | 1.41436000  | -0.96380800 |
| C  | -0.46729200 | 1.81963200  | -0.94786400 |
| N  | -1.65038700 | 2.11335200  | -1.14739300 |
| C  | 1.84288800  | 2.40840300  | -1.11401800 |
| C  | 2.20902000  | 2.99625900  | 0.27171100  |
| C  | 3.03332000  | 1.72888800  | -1.80943500 |
| C  | 4.22480400  | 2.69025900  | -1.91356200 |
| C  | 3.70550200  | 2.87898400  | 0.57936100  |
| C  | 4.56162200  | 3.38997300  | -0.58484700 |
| C  | -2.69453500 | 2.55367700  | -0.19451300 |
| C  | -4.06164100 | 2.26892400  | -0.84794400 |
| C  | -5.19701600 | 2.71993400  | 0.07814400  |
| C  | -5.08949900 | 2.04795900  | 1.45419700  |
| C  | -3.72277900 | 2.31872400  | 2.09871800  |
| C  | -2.58012700 | 1.86599600  | 1.18127800  |
| H  | 5.09971000  | -0.74602300 | 2.86087600  |
| H  | -0.13392200 | 0.02073100  | 1.17926000  |
| H  | 0.75510500  | 1.40800100  | 1.83155500  |
| H  | 0.36389500  | 0.01738300  | 2.87264700  |
| H  | 3.78362800  | 0.44163900  | 4.36922600  |
| H  | 2.08941000  | -0.05254800 | 4.36323900  |
| H  | 2.56799000  | 1.49363700  | 3.63770400  |
| H  | 6.29203400  | -1.66729100 | -0.25081900 |
| H  | 5.76456700  | -3.16987500 | 0.53165900  |
| H  | 6.54919600  | -1.90446600 | 1.48052600  |
| H  | 2.77381600  | -2.91468300 | -1.56232400 |
| H  | 4.47831100  | -3.04718100 | -1.20915200 |

|   |             |             |             |
|---|-------------|-------------|-------------|
| H | 3.89888600  | -1.65526000 | -2.12608200 |
| H | -5.59969200 | -1.37611800 | 0.15510700  |
| H | -3.99886700 | -1.12772100 | 3.21007300  |
| H | -4.16055000 | -2.86951100 | 2.92702400  |
| H | -5.46237200 | -1.77369300 | 2.45743800  |
| H | -0.39871800 | -2.24549900 | 1.94955800  |
| H | -1.73001200 | -3.24082500 | 2.52263700  |
| H | -1.61961800 | -1.54338500 | 3.01836300  |
| H | -1.14692600 | -2.03518700 | -2.91099300 |
| H | -1.40039800 | -0.27888700 | -2.80529400 |
| H | -2.60563200 | -1.31771700 | -3.57013400 |
| H | -5.90001300 | -0.87067000 | -2.10655700 |
| H | -4.88961600 | -1.95529800 | -3.06710400 |
| H | -4.53067900 | -0.22001900 | -3.01474600 |
| H | 1.50216000  | 3.25278400  | -1.77364800 |
| H | 1.63822100  | 2.48265600  | 1.07927200  |
| H | 1.90006300  | 4.05673900  | 0.30621400  |
| H | 2.73974400  | 1.39143400  | -2.82178300 |
| H | 3.32969300  | 0.81379900  | -1.25590700 |
| H | 4.02199300  | 3.45201600  | -2.69005300 |
| H | 5.10545100  | 2.12369300  | -2.27236600 |
| H | 3.95651800  | 1.81737200  | 0.79324400  |
| H | 3.94475700  | 3.43958600  | 1.50155000  |
| H | 4.42190800  | 4.48191000  | -0.69547800 |
| H | 5.63164500  | 3.24513400  | -0.34511100 |
| H | -2.57082500 | 3.66479600  | -0.06856500 |
| H | -4.15285200 | 1.18406100  | -1.06350100 |
| H | -4.12880200 | 2.77780100  | -1.82733000 |
| H | -6.17168900 | 2.47550200  | -0.38501700 |
| H | -5.18158000 | 3.82059100  | 0.19216000  |
| H | -5.23566000 | 0.95353400  | 1.34540200  |
| H | -5.89898000 | 2.40544600  | 2.11589700  |
| H | -3.65261100 | 1.78901200  | 3.06755400  |
| H | -3.62090900 | 3.39624100  | 2.32980000  |
| H | -2.62100300 | 0.76223200  | 1.05109200  |
| H | -1.60500900 | 2.08751800  | 1.64902100  |

Molecule 2 – IM1

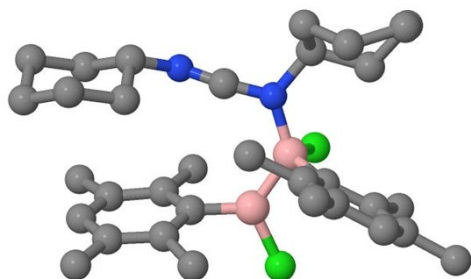

Energy: -140.10 kcal/mol

|    |             |             |             |
|----|-------------|-------------|-------------|
| B  | 0.12609700  | -1.52620100 | -0.75251300 |
| B  | 1.06473800  | -0.17191900 | -1.02831300 |
| C  | 2.11683100  | -0.63947200 | 0.12130600  |
| C  | 1.81904700  | -0.30074800 | 1.45050600  |
| C  | 3.32183300  | -1.29396300 | -0.18319000 |
| C  | 4.20050000  | -1.63828600 | 0.85691500  |
| C  | 3.90905400  | -1.27936200 | 2.17019100  |
| C  | 2.73660700  | -0.59687000 | 2.47053200  |
| C  | 0.56492800  | 0.40322200  | 1.87107100  |
| C  | 2.49583500  | -0.19570400 | 3.89133200  |
| C  | 5.47559000  | -2.38208700 | 0.61344800  |
| C  | 3.74600400  | -1.61591500 | -1.57869100 |
| Cl | 1.38907200  | -0.38674600 | -2.82225500 |
| Cl | 0.77647500  | -3.09485800 | -0.99291700 |
| C  | -1.40068800 | -1.55714800 | -0.42434000 |
| C  | -2.30857600 | -1.34309000 | -1.46662500 |
| C  | -1.83149400 | -1.94970400 | 0.84296400  |
| C  | -3.20957800 | -1.99751700 | 1.10921300  |
| C  | -4.11918600 | -1.74339700 | 0.08628400  |
| C  | -3.68198100 | -1.44999900 | -1.20581200 |
| C  | -3.71972000 | -2.34283400 | 2.46918400  |
| C  | -0.88426300 | -2.40273200 | 1.90404300  |
| C  | -1.82401000 | -1.04203500 | -2.84487900 |
| C  | -4.70452000 | -1.28043200 | -2.28257500 |
| N  | 0.66043200  | 1.33830800  | -0.93348100 |
| C  | -0.57325800 | 1.64537200  | -0.83519100 |
| N  | -1.72980800 | 1.98972100  | -0.97404100 |
| C  | 1.61212800  | 2.48346100  | -1.11933200 |
| C  | 1.65323400  | 3.36031700  | 0.15788100  |
| C  | 3.02039800  | 2.01963100  | -1.51901900 |
| C  | 4.02734900  | 3.14307900  | -1.25175100 |
| C  | 2.88407300  | 3.04820400  | 1.01303200  |
| C  | 4.17787900  | 3.38738000  | 0.25848400  |
| C  | -2.79268100 | 2.34618100  | -0.04386800 |
| C  | -4.12636000 | 2.00348900  | -0.73681900 |
| C  | -5.29811600 | 2.34385900  | 0.18648900  |
| C  | -5.16756800 | 1.58851200  | 1.51482400  |
| C  | -3.84880900 | 1.95291000  | 2.20687100  |
| C  | -2.66100500 | 1.61215200  | 1.30335800  |
| H  | 4.60543400  | -1.53191100 | 2.96560700  |
| H  | -0.29951500 | 0.18224000  | 1.23484200  |
| H  | 0.71854300  | 1.49013300  | 1.88665200  |
| H  | 0.24783600  | 0.10920600  | 2.88292800  |
| H  | 3.36930700  | -0.37953900 | 4.53015000  |
| H  | 1.65840500  | -0.75951700 | 4.32677800  |
| H  | 2.26217400  | 0.87443300  | 3.97366700  |
| H  | 6.16346000  | -1.80248800 | -0.01817300 |
| H  | 5.28439800  | -3.34391200 | 0.11441300  |
| H  | 6.01282000  | -2.61105200 | 1.54230000  |
| H  | 3.02404600  | -2.25801000 | -2.10388500 |
| H  | 4.69776200  | -2.15555700 | -1.63850400 |
| H  | 3.88390800  | -0.70300500 | -2.17657600 |

|   |             |             |             |
|---|-------------|-------------|-------------|
| H | -5.18552400 | -1.80284400 | 0.28952800  |
| H | -3.35538500 | -1.63421200 | 3.22608700  |
| H | -3.38886700 | -3.34793500 | 2.77220600  |
| H | -4.81524600 | -2.33788200 | 2.52371100  |
| H | 0.17614500  | -2.20191300 | 1.69394100  |
| H | -0.96317000 | -3.49483900 | 2.03425400  |
| H | -1.09708500 | -1.93903400 | 2.87601200  |
| H | -1.01890400 | -1.72368500 | -3.16433100 |
| H | -1.43814100 | -0.01379200 | -2.92126400 |
| H | -2.60271900 | -1.13823000 | -3.61081100 |
| H | -5.72744400 | -1.23293900 | -1.88945800 |
| H | -4.67124300 | -2.12887300 | -2.98407800 |
| H | -4.54110000 | -0.36390900 | -2.86691300 |
| H | 1.20202500  | 3.10147600  | -1.96801300 |
| H | 0.73442800  | 3.24385900  | 0.75802900  |
| H | 1.67892800  | 4.42605500  | -0.14345100 |
| H | 3.04493500  | 1.72276900  | -2.58474200 |
| H | 3.33542200  | 1.12033500  | -0.94647800 |
| H | 3.71276700  | 4.07096500  | -1.76209400 |
| H | 5.00678400  | 2.87648000  | -1.69096300 |
| H | 2.88721200  | 1.97011900  | 1.28716800  |
| H | 2.84135400  | 3.60043800  | 1.96757700  |
| H | 4.46586700  | 4.43727500  | 0.44194000  |
| H | 5.00471500  | 2.77071400  | 0.65961800  |
| H | -2.72932200 | 3.45862200  | 0.11745800  |
| H | -4.14621700 | 0.92314400  | -0.99392100 |
| H | -4.21011100 | 2.54330400  | -1.69751100 |
| H | -6.25213900 | 2.08006000  | -0.30754500 |
| H | -5.34475300 | 3.43305700  | 0.36886300  |
| H | -5.20457100 | 0.49521900  | 1.33141400  |
| H | -6.02363100 | 1.81753800  | 2.17316500  |
| H | -3.75940600 | 1.40398200  | 3.16371400  |
| H | -3.83989700 | 3.02632600  | 2.47069600  |
| H | -2.63047500 | 0.51168700  | 1.13101700  |
| H | -1.71352000 | 1.87847000  | 1.80466500  |

Molecule 2 – TS2

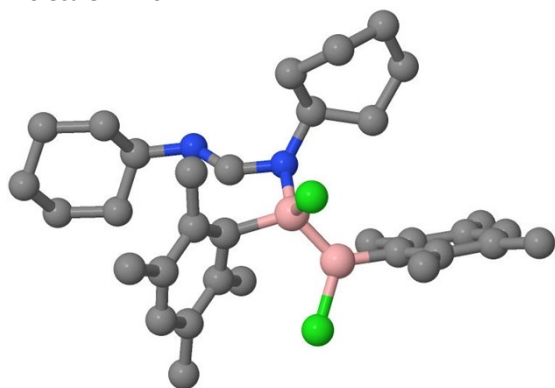

Energy: -113.86 kcal/mol

|    |             |             |             |
|----|-------------|-------------|-------------|
| B  | -1.37600800 | 1.26267600  | 0.09293600  |
| B  | -0.24748600 | 0.08007600  | 0.36926700  |
| C  | 1.40343200  | 0.56630600  | 0.26568000  |
| C  | 1.56219500  | 1.72754300  | -0.50665700 |
| C  | 2.12472700  | 0.39678500  | 1.45903700  |
| C  | 2.86519000  | 1.47544000  | 1.96957800  |
| C  | 2.91743500  | 2.66489200  | 1.24781900  |
| C  | 2.30663800  | 2.80076200  | 0.00721400  |
| C  | 1.01782900  | 1.80157800  | -1.90073300 |
| C  | 2.43433500  | 4.08912500  | -0.74204600 |
| C  | 3.59383200  | 1.37171900  | 3.27214900  |
| C  | 2.16927600  | -0.91362600 | 2.17446300  |
| Cl | -0.71542100 | -0.32264300 | 2.11622100  |
| Cl | -0.88263400 | 2.95459300  | 0.27711800  |
| C  | -2.88482800 | 1.04393000  | -0.21128300 |
| C  | -3.81758400 | 1.06955200  | 0.83246500  |
| C  | -3.27151700 | 0.82970900  | -1.54166400 |
| C  | -4.63424000 | 0.61321400  | -1.83384200 |
| C  | -5.56713700 | 0.59843800  | -0.78848600 |
| C  | -5.17747900 | 0.81997700  | 0.53720200  |
| C  | -5.10504500 | 0.39966200  | -3.23897800 |
| C  | -2.25771300 | 0.85709300  | -2.64149600 |
| C  | -3.39758600 | 1.34705100  | 2.23976000  |
| C  | -6.21136900 | 0.79346200  | 1.61936400  |
| N  | -0.05933400 | -1.13073500 | -0.54775300 |
| C  | 1.29208100  | -1.00520000 | -0.71695400 |
| N  | 2.20951500  | -1.57669600 | -1.34378600 |
| C  | -0.74047100 | -2.45159800 | -0.54655800 |
| C  | -0.22680800 | -3.35410400 | 0.60722000  |
| C  | -2.26015000 | -2.22857700 | -0.48979600 |
| C  | -3.00519400 | -3.56771200 | -0.45302500 |
| C  | -1.36534200 | -3.89090800 | 1.48017000  |
| C  | -2.47680200 | -4.52264500 | 0.63301300  |
| C  | 3.65849400  | -1.41945000 | -1.49236800 |
| C  | 4.12848100  | 0.04025600  | -1.65884900 |
| C  | 5.64220600  | 0.07344200  | -1.90509700 |
| C  | 6.40406300  | -0.61315400 | -0.76224700 |
| C  | 5.90956000  | -2.04992500 | -0.54233000 |
| C  | 4.39427400  | -2.09428900 | -0.31122700 |
| H  | 3.47186300  | 3.51285400  | 1.66308700  |
| H  | 0.22955700  | 1.04956100  | -2.10298200 |
| H  | 1.81946300  | 1.62934800  | -2.63435700 |
| H  | 0.57223900  | 2.78250800  | -2.12365400 |
| H  | 3.06392700  | 4.82120600  | -0.22106900 |
| H  | 1.44467500  | 4.55682200  | -0.87362700 |
| H  | 2.86865300  | 3.93992000  | -1.73918000 |
| H  | 4.36013700  | 0.58529600  | 3.24510400  |
| H  | 2.90099900  | 1.13106000  | 4.09295200  |

|   |             |             |             |
|---|-------------|-------------|-------------|
| H | 4.09896200  | 2.30597100  | 3.54857000  |
| H | 1.80346200  | -0.81240600 | 3.21050900  |
| H | 3.20145800  | -1.29685900 | 2.22092200  |
| H | 1.54980400  | -1.70947300 | 1.71766700  |
| H | -6.61626900 | 0.41701000  | -1.01313400 |
| H | -4.67028200 | -0.51287600 | -3.66926900 |
| H | -4.81905100 | 1.24151100  | -3.88453100 |
| H | -6.19565600 | 0.29992200  | -3.30478900 |
| H | -2.48487500 | 0.13143500  | -3.43327100 |
| H | -1.23888200 | 0.61047100  | -2.28707100 |
| H | -2.22031800 | 1.85274400  | -3.10469600 |
| H | -2.42465100 | 1.85366700  | 2.31248200  |
| H | -3.30875900 | 0.40993700  | 2.81042900  |
| H | -4.11635600 | 1.99019200  | 2.76365500  |
| H | -7.20189500 | 0.50376700  | 1.24835400  |
| H | -6.31645800 | 1.78190700  | 2.08861300  |
| H | -5.93954600 | 0.08036400  | 2.41024200  |
| H | -0.48384700 | -2.94856100 | -1.52261900 |
| H | 0.48806300  | -2.79543900 | 1.25420400  |
| H | 0.34751400  | -4.19436000 | 0.17651400  |
| H | -2.59151500 | -1.63130300 | -1.36147900 |
| H | -2.53062200 | -1.62038800 | 0.40060000  |
| H | -2.93798700 | -4.05928700 | -1.44169700 |
| H | -4.08176200 | -3.36909700 | -0.28783200 |
| H | -1.78218300 | -3.05938500 | 2.08733700  |
| H | -0.97129400 | -4.63009400 | 2.20111300  |
| H | -2.09886600 | -5.44807800 | 0.15926400  |
| H | -3.30689100 | -4.83689900 | 1.29251600  |
| H | 3.89227200  | -1.98690500 | -2.43961300 |
| H | 3.89000800  | 0.62908500  | -0.75136300 |
| H | 3.58938200  | 0.52418000  | -2.49372600 |
| H | 5.98012500  | 1.12216500  | -2.00626500 |
| H | 5.88159900  | -0.41843800 | -2.86752100 |
| H | 6.28143500  | -0.02898400 | 0.17035700  |
| H | 7.48808600  | -0.61723200 | -0.98082800 |
| H | 6.43214000  | -2.49997800 | 0.32277100  |
| H | 6.17534700  | -2.67621900 | -1.41622300 |
| H | 4.13817600  | -1.58705100 | 0.64056300  |
| H | 4.05305600  | -3.14097700 | -0.20303600 |

Molecule 2 – IM2

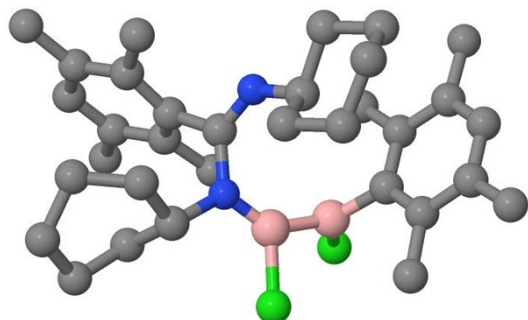

Energy: -146.70 kcal/mol

|    |             |             |             |
|----|-------------|-------------|-------------|
| B  | 1.35562700  | -2.02511200 | -0.10434800 |
| B  | 0.19669900  | -1.42077600 | 0.88210700  |
| C  | -2.21363700 | 0.33662100  | -1.03443900 |
| C  | -3.04275500 | 1.47037800  | -1.12624200 |
| C  | -2.63456400 | -0.88836900 | -1.56987800 |
| C  | -3.96256900 | -1.03388900 | -1.99506700 |
| C  | -4.82319400 | 0.05933900  | -1.95628400 |
| C  | -4.36709800 | 1.31439900  | -1.55775400 |
| C  | -2.51479000 | 2.83151800  | -0.82061000 |
| C  | -5.32076300 | 2.46307600  | -1.59804400 |
| C  | -4.48049400 | -2.34656200 | -2.48137400 |
| C  | -1.69391300 | -2.03230000 | -1.71922300 |
| Cl | 0.33792500  | -2.51551600 | 2.26948500  |
| Cl | 1.13078100  | -3.57781800 | -0.79635900 |
| C  | 2.68661000  | -1.26806900 | -0.36043400 |
| C  | 3.64714100  | -1.13097600 | 0.64074600  |
| C  | 2.87496500  | -0.72068600 | -1.63591000 |
| C  | 4.03980200  | 0.01339000  | -1.89455400 |
| C  | 4.97546900  | 0.20203800  | -0.87674500 |
| C  | 4.78803200  | -0.35425400 | 0.38633500  |
| C  | 4.30594800  | 0.62335000  | -3.23154100 |
| C  | 1.83485500  | -0.89512000 | -2.69369100 |
| C  | 3.47923300  | -1.79820200 | 1.96475500  |
| C  | 5.81093700  | -0.09947200 | 1.44408000  |
| N  | -0.73552300 | -0.42108000 | 0.82809000  |
| C  | -0.90674000 | 0.45834400  | -0.31911500 |
| N  | -0.07649800 | 1.34986500  | -0.69487000 |
| C  | -1.69809700 | -0.27105200 | 1.95421000  |
| C  | -2.11036100 | 1.19279200  | 2.22869600  |
| C  | -2.92110200 | -1.18150600 | 1.71877400  |
| C  | -3.87643600 | -1.08281000 | 2.91012700  |
| C  | -3.63117700 | 1.36782900  | 2.24884400  |
| C  | -4.28755100 | 0.37027400  | 3.20883700  |
| C  | 1.18288800  | 1.75244800  | -0.10267700 |
| C  | 1.69837300  | 2.94408100  | -0.94827300 |
| C  | 3.09309100  | 3.34341400  | -0.45830400 |
| C  | 3.06302300  | 3.71398600  | 1.03041600  |
| C  | 2.49355100  | 2.56027100  | 1.86647100  |
| C  | 1.09010800  | 2.18036700  | 1.37812100  |
| H  | -5.86119700 | -0.06281100 | -2.26188900 |
| H  | -1.66060200 | 3.06093000  | -1.48722000 |
| H  | -2.13474000 | 2.91769500  | 0.20789400  |
| H  | -3.24633800 | 3.63411800  | -0.95763200 |
| H  | -6.33937700 | 2.15521200  | -1.86860700 |
| H  | -5.00865900 | 3.21327500  | -2.34008300 |
| H  | -5.39049700 | 2.96459100  | -0.62188600 |
| H  | -4.23276000 | -3.16281300 | -1.78648100 |
| H  | -4.05275900 | -2.60411500 | -3.46200600 |
| H  | -5.57183400 | -2.35086300 | -2.59934400 |
| H  | -0.67051800 | -1.68753900 | -1.92391200 |



|   |             |             |             |
|---|-------------|-------------|-------------|
| H | -1.95462500 | -2.68476700 | -2.56563800 |
| H | -1.68803900 | -2.67225500 | -0.82362600 |
| H | 5.86908300  | 0.79027000  | -1.07470500 |
| H | 3.54542700  | 1.37815900  | -3.48266100 |
| H | 4.30007600  | -0.13678200 | -4.02612500 |
| H | 5.28104300  | 1.12455400  | -3.28025800 |
| H | 1.76520000  | -1.94159600 | -3.02391500 |
| H | 2.03621500  | -0.30458900 | -3.59753000 |
| H | 0.84041100  | -0.56007900 | -2.35517700 |
| H | 3.04900400  | -2.80667000 | 1.87753200  |
| H | 2.83754600  | -1.20549200 | 2.63358500  |
| H | 4.43356700  | -1.94107600 | 2.48999100  |
| H | 6.55212700  | 0.65087400  | 1.14010200  |
| H | 6.36636500  | -1.01709100 | 1.68820700  |
| H | 5.34809000  | 0.26744000  | 2.37157900  |
| H | -1.18811000 | -0.62457600 | 2.89794100  |
| H | -1.66567900 | 1.88960300  | 1.49236700  |
| H | -1.69187500 | 1.50578400  | 3.20537900  |
| H | -2.60157200 | -2.23085500 | 1.57468200  |
| H | -3.44858100 | -0.89755600 | 0.78782200  |
| H | -3.40448600 | -1.53141800 | 3.80482200  |
| H | -4.77466300 | -1.69583100 | 2.70853200  |
| H | -4.04358600 | 1.23716500  | 1.22736700  |
| H | -3.88805700 | 2.40218300  | 2.54287000  |
| H | -4.01974000 | 0.62715200  | 4.25053500  |
| H | -5.38671000 | 0.47104100  | 3.14835500  |
| H | 1.93230800  | 0.91967500  | -0.18265600 |
| H | 0.99612000  | 3.79223400  | -0.87868000 |
| H | 1.72628200  | 2.65646900  | -2.01551100 |
| H | 3.47778000  | 4.18935500  | -1.05422100 |
| H | 3.80236200  | 2.50666900  | -0.62349300 |
| H | 2.45303200  | 4.62381900  | 1.17902300  |
| H | 4.08116200  | 3.96584900  | 1.37730400  |
| H | 2.46132500  | 2.84137200  | 2.93376200  |
| H | 3.16529900  | 1.68046600  | 1.80054800  |
| H | 0.40007800  | 3.03532000  | 1.48573100  |
| H | 0.68689900  | 1.36422200  | 2.00133200  |

## Molecule 2 – TS3

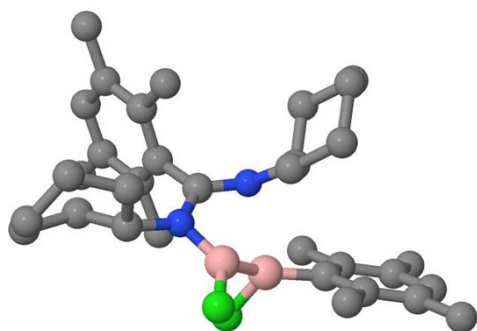

Energy: -110.52 kcal/mol

|    |             |             |             |
|----|-------------|-------------|-------------|
| B  | 1.44633000  | -0.13102000 | -1.19105500 |
| B  | 0.32398000  | -1.34602200 | -1.08361100 |
| C  | -2.09098300 | 1.13734400  | 0.22801100  |
| C  | -2.92686100 | 0.94039100  | 1.35419700  |
| C  | -2.33660600 | 2.17846100  | -0.68304300 |
| C  | -3.48540300 | 2.98527000  | -0.51365900 |
| C  | -4.32943100 | 2.76226300  | 0.57648800  |
| C  | -4.05892300 | 1.76016200  | 1.51903600  |
| C  | -2.59640300 | -0.12140300 | 2.35128400  |
| C  | -4.98655000 | 1.59861700  | 2.68272100  |
| C  | -3.81870200 | 4.07984200  | -1.47791400 |
| C  | -1.38256100 | 2.43037800  | -1.79884800 |
| Cl | 0.60066300  | -2.94754100 | -1.78252200 |
| Cl | 0.97260400  | 0.61239500  | -2.76864100 |
| C  | 2.89969100  | 0.25590500  | -0.78943200 |
| C  | 3.86618700  | -0.74605900 | -0.60106500 |
| C  | 3.23599400  | 1.61921000  | -0.71783800 |
| C  | 4.57799800  | 1.98163200  | -0.46075300 |
| C  | 5.54097700  | 0.98334100  | -0.28037400 |
| C  | 5.20485300  | -0.37368800 | -0.34944800 |
| C  | 4.99892600  | 3.41686500  | -0.39117700 |
| C  | 2.22432400  | 2.70182900  | -0.92072400 |
| C  | 3.49193200  | -2.18961900 | -0.68583100 |
| C  | 6.28689200  | -1.39239200 | -0.16325600 |
| N  | -0.98747300 | -0.98882600 | -0.61210200 |
| C  | -0.89651500 | 0.23978300  | 0.10996600  |
| N  | 0.23963500  | 0.64037400  | 0.62585900  |
| C  | -2.17833000 | -1.79606500 | -0.99682900 |
| C  | -2.47355400 | -2.84644300 | 0.09910900  |
| C  | -3.43696600 | -0.97760300 | -1.33096400 |
| C  | -4.48701700 | -1.89031000 | -1.98705600 |
| C  | -3.90626400 | -3.39064800 | -0.00953700 |
| C  | -4.44456500 | -3.32987000 | -1.44496800 |
| C  | 1.13651200  | 0.01250700  | 1.61858300  |
| C  | 0.79851300  | 0.72038000  | 2.96120900  |
| C  | 1.70379400  | 0.21440800  | 4.08714500  |
| C  | 1.59903100  | -1.30851500 | 4.24114100  |
| C  | 1.92255300  | -2.01307200 | 2.91751500  |
| C  | 1.02591300  | -1.51892800 | 1.77328800  |
| H  | -5.21316300 | 3.38743000  | 0.70477700  |
| H  | -1.63303900 | 0.10799100  | 2.85694100  |
| H  | -2.48929900 | -1.11566000 | 1.87708500  |
| H  | -3.34633900 | -0.23272300 | 3.14160800  |
| H  | -5.84036100 | 2.28730100  | 2.63719900  |
| H  | -4.46853500 | 1.79665000  | 3.63227600  |
| H  | -5.39960300 | 0.58156200  | 2.73074700  |

|   |             |             |             |
|---|-------------|-------------|-------------|
| H | -3.90160600 | 3.69748000  | -2.50526300 |
| H | -3.04408800 | 4.86075800  | -1.47502600 |
| H | -4.77029500 | 4.57335100  | -1.24235500 |
| H | -0.34189000 | 2.47955100  | -1.41826200 |
| H | -1.55353200 | 3.37610800  | -2.32540500 |
| H | -1.43463400 | 1.63297800  | -2.55483500 |
| H | 6.57449100  | 1.26777400  | -0.08791900 |
| H | 4.46745900  | 3.94964800  | 0.40982900  |
| H | 4.78259300  | 3.93714100  | -1.33515800 |
| H | 6.07268300  | 3.53153100  | -0.19862800 |
| H | 2.24338700  | 3.04955200  | -1.96422300 |
| H | 2.41406700  | 3.56959200  | -0.27485300 |
| H | 1.18725600  | 2.39672500  | -0.69314300 |
| H | 3.24681400  | -2.46920700 | -1.72170900 |
| H | 2.61915300  | -2.41764000 | -0.04753700 |
| H | 4.28901300  | -2.86871500 | -0.36175400 |
| H | 7.25640500  | -0.93566200 | 0.07209500  |
| H | 6.42626300  | -1.98854600 | -1.07651400 |
| H | 6.05062100  | -2.08482400 | 0.65603300  |
| H | -1.90469100 | -2.34689400 | -1.94464700 |
| H | -2.32417400 | -2.40346000 | 1.10971900  |
| H | -1.73833700 | -3.66945800 | 0.01622500  |
| H | -3.18877900 | -0.13343800 | -2.00065300 |
| H | -3.86977200 | -0.52823100 | -0.41651700 |
| H | -4.34130500 | -1.90728800 | -3.08377500 |
| H | -5.49088200 | -1.45465300 | -1.82298000 |
| H | -4.57592500 | -2.81012300 | 0.65496400  |
| H | -3.93743900 | -4.43289700 | 0.35944800  |
| H | -3.81292200 | -3.95910400 | -2.10206600 |
| H | -5.45607300 | -3.77477800 | -1.48520300 |
| H | 2.19487400  | 0.28561200  | 1.35746600  |
| H | -0.27058500 | 0.55652200  | 3.22298000  |
| H | 0.90971700  | 1.81465700  | 2.83540400  |
| H | 1.43357100  | 0.71223600  | 5.03702100  |
| H | 2.75448500  | 0.50012200  | 3.88257200  |
| H | 0.58120800  | -1.58388000 | 4.57595200  |
| H | 2.28753200  | -1.65766100 | 5.03281700  |
| H | 1.80750800  | -3.10695100 | 3.03344300  |
| H | 2.98610100  | -1.84297700 | 2.65467000  |
| H | -0.02045400 | -1.81909400 | 1.95621900  |
| H | 1.34957300  | -2.03039100 | 0.83584800  |

### Molecule 2 – Product

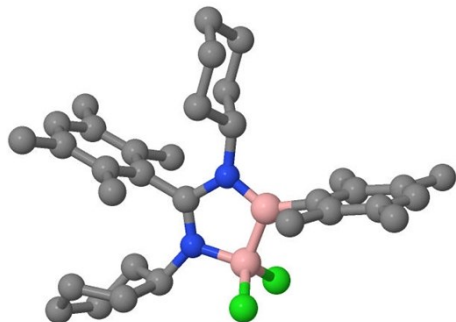

Energy:-182.72 kcal/mol

|    |             |             |             |
|----|-------------|-------------|-------------|
| B  | -1.54287000 | -0.38719100 | 0.04151800  |
| B  | -0.85964200 | -1.92985000 | 0.16764500  |
| C  | 2.06632200  | 0.56749900  | 0.04358300  |
| C  | 2.64789100  | 0.96970100  | 1.25437300  |
| C  | 2.68322900  | 0.82203900  | -1.18662200 |
| C  | 3.91219400  | 1.49774100  | -1.19985200 |
| C  | 4.48783000  | 1.91001100  | -0.00015800 |
| C  | 3.86920800  | 1.65472700  | 1.22322800  |
| C  | 2.00718300  | 0.66514300  | 2.56677200  |
| C  | 4.51876800  | 2.10936400  | 2.48534000  |
| C  | 4.60955800  | 1.78166300  | -2.48632100 |
| C  | 2.06573800  | 0.39803000  | -2.47616200 |
| Cl | -1.19526700 | -2.94467900 | -1.27298200 |
| Cl | -1.27100900 | -2.68127000 | 1.74436100  |
| C  | -3.07211000 | -0.19158300 | -0.01245500 |
| C  | -3.71345300 | -0.22095500 | -1.25087300 |
| C  | -3.77884600 | -0.02622800 | 1.17851100  |
| C  | -5.17729600 | 0.06413200  | 1.12782100  |
| C  | -5.82986600 | 0.00915900  | -0.10300400 |
| C  | -5.11200400 | -0.12964100 | -1.29028100 |
| C  | -5.98398400 | 0.20788400  | 2.37679500  |
| C  | -3.08142200 | 0.03795300  | 2.49831100  |
| C  | -2.94526600 | -0.36433000 | -2.52448100 |
| C  | -5.85017100 | -0.19028400 | -2.58750300 |
| N  | 0.66241000  | -1.47524600 | 0.16733900  |
| C  | 0.78459200  | -0.16058700 | 0.07344400  |
| N  | -0.45183400 | 0.51092400  | 0.01016800  |
| C  | 1.68576100  | -2.52764600 | 0.19315600  |
| C  | 2.28120900  | -2.76459900 | -1.21497300 |
| C  | 2.77669600  | -2.30254700 | 1.25404600  |
| C  | 3.82888300  | -3.40613200 | 1.11206200  |
| C  | 3.77995400  | -2.46578200 | -1.26257300 |
| C  | 4.55284300  | -3.31578100 | -0.24337200 |
| C  | -0.66168400 | 1.96280200  | -0.06859900 |
| C  | -0.13850200 | 2.71913000  | 1.16646900  |
| C  | -0.61584400 | 4.17466200  | 1.08617000  |
| C  | -0.10536300 | 4.83388700  | -0.20288600 |
| C  | -0.56570500 | 4.04693200  | -1.43802700 |
| C  | -0.08976200 | 2.59107900  | -1.35284800 |
| H  | 5.44038300  | 2.43993500  | -0.01732100 |
| H  | 2.65165600  | 0.01686200  | 3.18252900  |
| H  | 1.03772100  | 0.15136200  | 2.48543600  |
| H  | 1.82867100  | 1.58105700  | 3.15177000  |
| H  | 5.47192300  | 2.62574200  | 2.31088200  |
| H  | 4.73325400  | 1.26233400  | 3.15504700  |
| H  | 3.87420900  | 2.80886300  | 3.03946100  |
| H  | 4.01365800  | 2.45076400  | -3.12601800 |
| H  | 4.79247600  | 0.85941000  | -3.05852900 |
| H  | 5.58528000  | 2.26460000  | -2.34285000 |
| H  | 1.05695400  | -0.02803800 | -2.37004800 |

|   |             |             |             |
|---|-------------|-------------|-------------|
| H | 2.68268500  | -0.36490000 | -2.97901600 |
| H | 1.97416300  | 1.24286400  | -3.17703600 |
| H | -6.91405300 | 0.07141400  | -0.13733200 |
| H | -5.77814400 | 1.16459900  | 2.87609300  |
| H | -5.75260800 | -0.59649500 | 3.09107000  |
| H | -7.06376400 | 0.16737600  | 2.18790500  |
| H | -3.18792300 | -0.92257800 | 3.03042200  |
| H | -3.50075600 | 0.82142700  | 3.14277200  |
| H | -2.00597100 | 0.23739300  | 2.42570700  |
| H | -1.87543100 | -0.14633700 | -2.42755800 |
| H | -3.32878600 | 0.30148600  | -3.30843500 |
| H | -3.02347100 | -1.39896300 | -2.89947900 |
| H | -6.93866100 | -0.20528300 | -2.45249800 |
| H | -5.58396700 | -1.09701000 | -3.15118900 |
| H | -5.61425900 | 0.67571700  | -3.22100100 |
| H | 1.13908300  | -3.47856200 | 0.49105900  |
| H | 1.74015300  | -2.17497900 | -1.97740300 |
| H | 2.10209900  | -3.82110100 | -1.50161400 |
| H | 2.32788300  | -2.31389700 | 2.26471400  |
| H | 3.26637400  | -1.32061800 | 1.13716100  |
| H | 3.34976000  | -4.39829700 | 1.22020500  |
| H | 4.55993600  | -3.33627800 | 1.93755300  |
| H | 3.96005600  | -1.39074700 | -1.06476900 |
| H | 4.17104900  | -2.65249000 | -2.27948800 |
| H | 4.71054300  | -4.33288800 | -0.64714100 |
| H | 5.56230600  | -2.88787100 | -0.10445900 |
| H | -1.79054200 | 2.10101200  | -0.09776300 |
| H | 0.96453000  | 2.69682200  | 1.20321300  |
| H | -0.50102400 | 2.24187300  | 2.09453600  |
| H | -0.25985500 | 4.73805500  | 1.96724300  |
| H | -1.72120900 | 4.21793200  | 1.12433900  |
| H | 0.99906600  | 4.89037600  | -0.18382400 |
| H | -0.46206500 | 5.87759200  | -0.26285200 |
| H | -0.17352200 | 4.51906300  | -2.35657600 |
| H | -1.66858500 | 4.08459200  | -1.52433100 |
| H | 1.01379100  | 2.56588400  | -1.34589100 |
| H | -0.41934500 | 2.02286100  | -2.24105800 |

### Molecule 3 – TS1

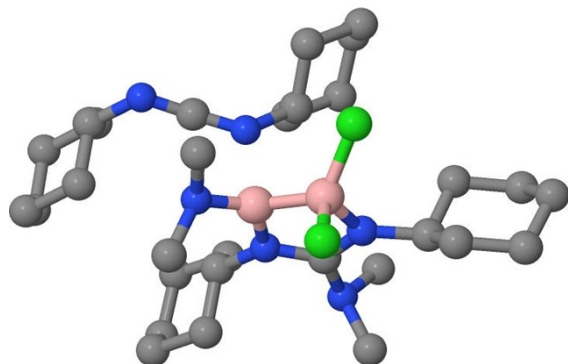

Energy:-176.96 kcal/mol

|    |             |             |             |
|----|-------------|-------------|-------------|
| C  | 1.11051300  | -1.28078000 | -0.64995400 |
| N  | -0.12837100 | -1.19350100 | -0.06255200 |
| N  | 2.17636800  | -0.83600200 | 0.07141000  |
| C  | 3.58285800  | -0.80410900 | -0.40823700 |
| C  | 4.54791500  | -1.27273700 | 0.69869300  |
| C  | 3.95729200  | 0.61650700  | -0.88815200 |
| C  | 5.39303500  | 0.61841800  | -1.42913400 |
| C  | 6.38189400  | 0.12193400  | -0.36389000 |
| C  | 5.98818600  | -1.26287800 | 0.16989800  |
| C  | -1.43894000 | -1.53677600 | -0.66725300 |
| C  | -1.62337200 | -3.06703300 | -0.76480300 |
| C  | -1.69764000 | -0.87955000 | -2.03787000 |
| C  | -3.04130700 | -3.39668000 | -1.24807300 |
| C  | -3.35304600 | -2.71029800 | -2.58625800 |
| C  | -3.12439200 | -1.19373400 | -2.50424000 |
| B  | 0.01616100  | -0.55802200 | 1.31922400  |
| B  | 1.69196900  | -0.41788800 | 1.48626600  |
| Cl | 2.42857200  | 1.11218900  | 2.12276400  |
| N  | -1.00182100 | -0.71459800 | 2.36394600  |
| C  | -1.40938600 | -2.11023400 | 2.64500000  |
| C  | -0.61037700 | 0.01378700  | 3.59574000  |
| H  | 3.69528700  | -1.51642000 | -1.27448900 |
| H  | 4.27125600  | -2.28273200 | 1.05608000  |
| H  | 4.46821700  | -0.61721400 | 1.59275700  |
| H  | 3.87939300  | 1.33362500  | -0.04353700 |
| H  | 3.24943200  | 0.97846600  | -1.65184400 |
| H  | 5.66888600  | 1.64152200  | -1.74753000 |
| H  | 5.46442300  | -0.01360800 | -2.33368000 |
| H  | 6.41295100  | 0.84423400  | 0.47644400  |
| H  | 7.40473200  | 0.09076500  | -0.78103400 |
| H  | 6.67783600  | -1.55927900 | 0.98386900  |
| H  | 6.11058100  | -2.02330700 | -0.62350800 |
| H  | -2.21637800 | -1.12430400 | 0.05864300  |
| H  | -1.43795000 | -3.52791400 | 0.22818200  |
| H  | -0.87419800 | -3.49653900 | -1.45633500 |
| H  | -0.98170100 | -1.26445700 | -2.79051200 |
| H  | -1.52879100 | 0.21676200  | -1.97782300 |
| H  | -3.78163000 | -3.08450900 | -0.48570300 |
| H  | -3.15433400 | -4.49216900 | -1.35211600 |
| H  | -4.39680900 | -2.92031400 | -2.88378700 |
| H  | -2.71389900 | -3.14040800 | -3.38157200 |
| H  | -3.87308400 | -0.74175400 | -1.81056900 |
| H  | -3.30651100 | -0.72984400 | -3.49087100 |
| H  | -2.31177700 | -2.10503000 | 3.27868200  |
| H  | -0.62671600 | -2.68805100 | 3.17292300  |
| H  | -1.64959200 | -2.65858700 | 1.71874000  |
| H  | 0.12514100  | -0.52256400 | 4.22025900  |
| H  | -1.50985500 | 0.21514800  | 4.19818200  |
| H  | -0.15526900 | 0.98819200  | 3.33756300  |

|    |             |             |             |
|----|-------------|-------------|-------------|
| N  | 1.18640600  | -1.87262000 | -1.99002700 |
| C  | 1.94353200  | -3.15759000 | -1.98318400 |
| C  | 1.67942000  | -0.92161500 | -3.02650300 |
| H  | 1.76705900  | -3.66896800 | -2.94400500 |
| H  | 1.55684500  | -3.81102900 | -1.18116200 |
| H  | 3.03336500  | -3.04532000 | -1.83630500 |
| H  | 1.19312100  | 0.06076700  | -2.90056600 |
| H  | 1.37956600  | -1.31673100 | -4.01347300 |
| H  | 2.77050400  | -0.76853600 | -3.03828400 |
| Cl | 2.10513400  | -1.78497100 | 2.67360500  |
| C  | -1.75620700 | 1.74731000  | 1.01810200  |
| N  | -2.82840900 | 1.99745400  | 1.59005200  |
| N  | -0.58728400 | 1.45563600  | 0.67035200  |
| C  | 0.27864400  | 2.26757000  | -0.21436900 |
| C  | 0.64167800  | 3.61707200  | 0.44047500  |
| C  | -0.38526700 | 2.49979700  | -1.59149700 |
| C  | 0.56941200  | 3.27301300  | -2.50796900 |
| C  | 0.98310200  | 4.60881200  | -1.87148300 |
| C  | 1.58700300  | 4.40390200  | -0.47466300 |
| C  | -4.17221100 | 1.49301900  | 1.23582200  |
| C  | -4.22030100 | -0.04248400 | 1.38860100  |
| C  | -4.57986100 | 1.93705000  | -0.18755700 |
| C  | -5.59808300 | -0.58649300 | 1.00366300  |
| C  | -5.98970400 | -0.14993300 | -0.41424300 |
| C  | -5.96146700 | 1.37828500  | -0.54828900 |
| H  | 1.21615000  | 1.65835600  | -0.34204400 |
| H  | 1.12470200  | 3.43369700  | 1.42334200  |
| H  | -0.26857200 | 4.20612700  | 0.65437000  |
| H  | -1.32761000 | 3.06697000  | -1.47066200 |
| H  | -0.67188000 | 1.52562300  | -2.04573600 |
| H  | 0.08632700  | 3.45610600  | -3.48592400 |
| H  | 1.47007200  | 2.66507800  | -2.71774400 |
| H  | 0.10286400  | 5.27661300  | -1.80129200 |
| H  | 1.70975700  | 5.12796600  | -2.52333800 |
| H  | 1.81747700  | 5.38412400  | -0.01590100 |
| H  | 2.55571900  | 3.87226900  | -0.55455800 |
| H  | -4.86190500 | 1.96720300  | 1.98622200  |
| H  | -3.96299400 | -0.32064500 | 2.43021600  |
| H  | -3.42391200 | -0.51906800 | 0.76556500  |
| H  | -3.83066600 | 1.59272700  | -0.92525600 |
| H  | -4.58642500 | 3.04159800  | -0.24779500 |
| H  | -6.35861800 | -0.23771900 | 1.72926400  |
| H  | -5.59691900 | -1.69067600 | 1.07369700  |
| H  | -6.99154700 | -0.53779400 | -0.67104300 |
| H  | -5.28038300 | -0.60036100 | -1.14894500 |
| H  | -6.73340100 | 1.82843600  | 0.10594500  |
| H  | -6.22776100 | 1.67440000  | -1.58022500 |

Molecule 3 – IM1

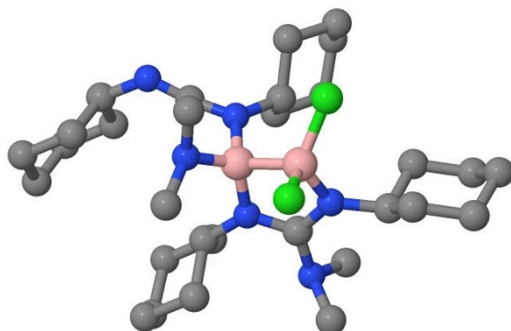

Energy:-193.80 kcal/mol

|    |             |             |             |
|----|-------------|-------------|-------------|
| C  | 1.10229600  | 1.39544800  | 0.44498300  |
| N  | -0.13558600 | 1.08369200  | 0.00800500  |
| N  | 2.12909300  | 0.79232400  | -0.19705200 |
| C  | 3.52528300  | 0.83259100  | 0.23266400  |
| C  | 4.48373900  | 1.07616500  | -0.95064200 |
| C  | 3.88712300  | -0.49590300 | 0.94311800  |
| C  | 5.32078700  | -0.40432300 | 1.47566600  |
| C  | 6.29624200  | -0.12814700 | 0.32258800  |
| C  | 5.91868200  | 1.16290900  | -0.41669400 |
| C  | -1.39874000 | 1.64445600  | 0.48575900  |
| C  | -1.47623700 | 3.17828000  | 0.31587800  |
| C  | -1.68175400 | 1.28449100  | 1.96287700  |
| C  | -2.89193000 | 3.64500600  | 0.66943900  |
| C  | -3.22347700 | 3.27714800  | 2.12243600  |
| C  | -3.08503300 | 1.76517000  | 2.34710600  |
| B  | -0.11690200 | 0.01243800  | -1.13104900 |
| B  | 1.64579000  | 0.13775200  | -1.51605300 |
| Cl | 2.35534800  | -1.45507900 | -1.94145300 |
| N  | -1.08534100 | 0.14320800  | -2.32613200 |
| C  | -1.33625700 | 1.50507400  | -2.81523300 |
| C  | -0.72629100 | -0.74472600 | -3.44745000 |
| H  | 3.67786200  | 1.67312600  | 0.96197400  |
| H  | 4.20970500  | 2.00193900  | -1.48905100 |
| H  | 4.41215200  | 0.26438900  | -1.70241800 |
| H  | 3.80578800  | -1.34363400 | 0.23423200  |
| H  | 3.17598300  | -0.70722200 | 1.75765900  |
| H  | 5.59483600  | -1.34630700 | 1.98472800  |
| H  | 5.40111300  | 0.38875000  | 2.23988200  |
| H  | 6.28410800  | -0.97872100 | -0.38709900 |
| H  | 7.32947800  | -0.06099300 | 0.70447200  |
| H  | 6.61710900  | 1.33462500  | -1.25713500 |
| H  | 6.03130700  | 2.03374500  | 0.25273900  |
| H  | -2.20869700 | 1.18167700  | -0.15241600 |
| H  | -1.21381900 | 3.46585200  | -0.71905000 |
| H  | -0.73712100 | 3.67423500  | 0.97149000  |
| H  | -0.92899300 | 1.76345400  | 2.61749900  |
| H  | -1.58923900 | 0.19605300  | 2.11834500  |
| H  | -3.62904600 | 3.18892200  | -0.01734800 |
| H  | -2.97704300 | 4.73713100  | 0.52544500  |
| H  | -4.24567400 | 3.60719800  | 2.37661800  |
| H  | -2.54659800 | 3.82005500  | 2.80854300  |
| H  | -3.85102300 | 1.22757100  | 1.75624300  |
| H  | -3.29005500 | 1.52020400  | 3.40480800  |
| H  | -2.42339100 | 1.61058700  | -2.97890000 |
| H  | -0.82493700 | 1.73460500  | -3.76691600 |
| H  | -1.01866400 | 2.28715600  | -2.11004900 |
| H  | 0.12571400  | -0.39765500 | -4.05657100 |
| H  | -1.60276300 | -0.83907900 | -4.11118100 |
| H  | -0.47482300 | -1.75577200 | -3.09022500 |
| N  | 1.22899800  | 2.31992100  | 1.54551900  |



|    |             |             |             |
|----|-------------|-------------|-------------|
| C  | 1.93990400  | 3.55580300  | 1.16519700  |
| C  | 1.74852800  | 1.69791700  | 2.77719300  |
| H  | 1.68421500  | 4.33602700  | 1.90307300  |
| H  | 1.58765000  | 3.90039200  | 0.17447800  |
| H  | 3.03653400  | 3.46479400  | 1.11881000  |
| H  | 1.25641000  | 0.72387600  | 2.94322300  |
| H  | 1.48335200  | 2.35499600  | 3.62494900  |
| H  | 2.83862900  | 1.54070300  | 2.79321400  |
| Cl | 1.85404800  | 1.34385300  | -2.85542400 |
| C  | -1.69149800 | -1.77613400 | -0.65500500 |
| N  | -2.74932600 | -2.23614900 | -1.05924700 |
| N  | -0.49969700 | -1.39247100 | -0.43136900 |
| C  | 0.37287600  | -2.12323600 | 0.50559800  |
| C  | 0.58680500  | -3.57058700 | 0.01811100  |
| C  | -0.21530300 | -2.12640700 | 1.93262900  |
| C  | 0.77991500  | -2.81873700 | 2.87094500  |
| C  | 1.06693200  | -4.25052700 | 2.39772900  |
| C  | 1.58629500  | -4.25658100 | 0.95367500  |
| C  | -4.10923000 | -1.84012100 | -0.71384400 |
| C  | -4.47373700 | -0.61818800 | -1.58662600 |
| C  | -4.25484300 | -1.51209600 | 0.78691200  |
| C  | -5.89418000 | -0.15174100 | -1.27118900 |
| C  | -6.03682500 | 0.18188700  | 0.21882900  |
| C  | -5.68060600 | -1.03632800 | 1.08049700  |
| H  | 1.36681000  | -1.59278500 | 0.53044900  |
| H  | 0.97078000  | -3.57278000 | -1.02314300 |
| H  | -0.36730000 | -4.12467300 | -0.00917100 |
| H  | -1.18923100 | -2.64467800 | 1.95657100  |
| H  | -0.40167800 | -1.08888300 | 2.27183000  |
| H  | 0.38168500  | -2.83274800 | 3.90143600  |
| H  | 1.72376300  | -2.24208200 | 2.91743400  |
| H  | 0.15001900  | -4.86352700 | 2.47112100  |
| H  | 1.80331900  | -4.72979800 | 3.06730200  |
| H  | 1.76848400  | -5.29360600 | 0.61794900  |
| H  | 2.56837100  | -3.74629800 | 0.89654900  |
| H  | -4.76413500 | -2.71277900 | -0.98113900 |
| H  | -4.37108800 | -0.87749400 | -2.65880700 |
| H  | -3.74208500 | 0.20167200  | -1.42316900 |
| H  | -3.52897600 | -0.72615200 | 1.07737700  |
| H  | -4.01364200 | -2.40001500 | 1.39827400  |
| H  | -6.62697100 | -0.92860000 | -1.55839300 |
| H  | -6.14213300 | 0.73578800  | -1.88399700 |
| H  | -7.06735000 | 0.51377500  | 0.43869300  |
| H  | -5.38282200 | 1.03784800  | 0.47664200  |
| H  | -6.40203200 | -1.85408200 | 0.89475200  |
| H  | -5.78180500 | -0.78592400 | 2.15287500  |

### Molecule 3 – TS2

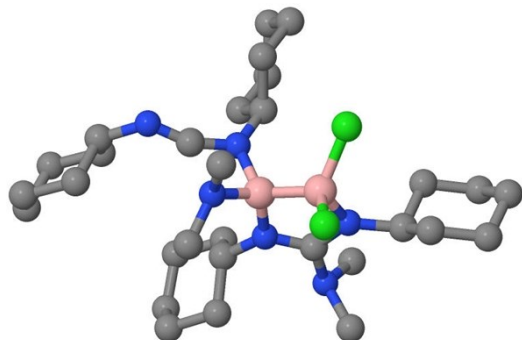

Energy:-181.88 kcal/mol

|    |             |             |             |
|----|-------------|-------------|-------------|
| C  | 1.46150400  | -1.38552900 | -0.36537400 |
| N  | 0.17448200  | -1.15151500 | 0.01607300  |
| N  | 2.43447700  | -0.62955900 | 0.21888700  |
| C  | 3.88213200  | -0.70132900 | -0.10707800 |
| C  | 4.74768100  | -0.63890100 | 1.16657000  |
| C  | 4.26554900  | 0.44016700  | -1.07714400 |
| C  | 5.74633800  | 0.32257900  | -1.45987200 |
| C  | 6.63889300  | 0.34626700  | -0.21009300 |
| C  | 6.23248200  | -0.74304700 | 0.79282300  |
| C  | -1.04198400 | -1.79967900 | -0.52040700 |
| C  | -1.08262500 | -3.32541700 | -0.28184300 |
| C  | -1.28911300 | -1.50890200 | -2.01627700 |
| C  | -2.47369000 | -3.85701100 | -0.65569900 |
| C  | -2.84344100 | -3.50351500 | -2.10514800 |
| C  | -2.69314800 | -2.00108900 | -2.38987800 |
| B  | 0.12527600  | 0.07649400  | 1.00456400  |
| B  | 1.79079900  | 0.24302100  | 1.32612200  |
| Cl | 2.41916200  | 1.96234900  | 1.35251400  |
| N  | -0.94923000 | 0.05896800  | 2.14175300  |
| C  | -1.45291900 | -1.26138700 | 2.57855300  |
| C  | -0.54560000 | 0.89987300  | 3.29941800  |
| H  | 4.10106500  | -1.68649300 | -0.61031100 |
| H  | 4.46801100  | -1.44726700 | 1.86824900  |
| H  | 4.56177600  | 0.30651700  | 1.72040300  |
| H  | 4.08423400  | 1.42248700  | -0.59205500 |
| H  | 3.62506600  | 0.43013300  | -1.97390500 |
| H  | 6.02358200  | 1.15523900  | -2.13344400 |
| H  | 5.92331200  | -0.60684700 | -2.03208700 |
| H  | 6.56538200  | 1.33931500  | 0.27688600  |
| H  | 7.69831800  | 0.22118700  | -0.49768900 |
| H  | 6.84633800  | -0.65420600 | 1.70981200  |
| H  | 6.45288100  | -1.74284100 | 0.37516300  |
| H  | -1.89694200 | -1.34355900 | 0.06435700  |
| H  | -0.84139300 | -3.56074700 | 0.76966900  |
| H  | -0.30904300 | -3.82944200 | -0.89359800 |
| H  | -0.52904900 | -2.02057200 | -2.63635800 |
| H  | -1.18254700 | -0.42251900 | -2.22706800 |
| H  | -3.23458500 | -3.44803000 | 0.03601800  |
| H  | -2.50044200 | -4.95482000 | -0.52112900 |
| H  | -3.87968900 | -3.82511900 | -2.31708400 |
| H  | -2.19603700 | -4.07496200 | -2.79878400 |
| H  | -3.45636700 | -1.42521300 | -1.82062300 |
| H  | -2.89279400 | -1.79992000 | -3.45837200 |
| H  | -2.06910800 | -1.17230600 | 3.48777400  |
| H  | -0.62797700 | -1.96313900 | 2.80159300  |
| H  | -2.08486100 | -1.70256000 | 1.78854400  |
| H  | -0.07924800 | 0.32941700  | 4.11921100  |
| H  | -1.43395500 | 1.41916600  | 3.69446000  |
| H  | 0.19505500  | 1.66598200  | 3.00006200  |
| N  | 1.69212700  | -2.44273300 | -1.35917700 |

|    |             |             |             |
|----|-------------|-------------|-------------|
| C  | 2.51047200  | -3.56013400 | -0.80626200 |
| C  | 2.22728400  | -1.92331000 | -2.64923000 |
| H  | 2.45421100  | -4.41169000 | -1.50362900 |
| H  | 2.08382100  | -3.88645100 | 0.15857400  |
| H  | 3.57466300  | -3.30743900 | -0.64007600 |
| H  | 1.66932200  | -1.02178900 | -2.95239400 |
| H  | 2.05606800  | -2.69537800 | -3.41980700 |
| H  | 3.30139100  | -1.67743200 | -2.64357100 |
| Cl | 2.17703700  | -0.50952700 | 2.97375600  |
| C  | -1.83625400 | 1.29413300  | 0.81804400  |
| N  | -2.95242400 | 1.74655000  | 1.11066800  |
| N  | -0.65014700 | 1.24875400  | 0.25530000  |
| C  | -0.15994800 | 2.19128200  | -0.77951500 |
| C  | -0.16436800 | 3.63972400  | -0.24637800 |
| C  | -1.00982100 | 2.09141100  | -2.06503500 |
| C  | -0.45530700 | 3.03882200  | -3.13531900 |
| C  | -0.41156300 | 4.48675900  | -2.62504500 |
| C  | 0.38139900  | 4.59371300  | -1.31481600 |
| C  | -4.32485400 | 1.27581100  | 0.87859400  |
| C  | -4.68682200 | 0.15415200  | 1.87627200  |
| C  | -4.53664600 | 0.80481800  | -0.57927400 |
| C  | -6.13665000 | -0.29557800 | 1.66457200  |
| C  | -6.37858800 | -0.74279700 | 0.21603200  |
| C  | -5.99007100 | 0.35873200  | -0.78024900 |
| H  | 0.90039900  | 1.87902400  | -0.99537600 |
| H  | 0.45613200  | 3.70162700  | 0.67247400  |
| H  | -1.18460100 | 3.94270100  | 0.05465700  |
| H  | -2.06449900 | 2.34620300  | -1.84921900 |
| H  | -1.01382300 | 1.04177500  | -2.43790200 |
| H  | -1.07688100 | 2.97894700  | -4.04804000 |
| H  | 0.56118400  | 2.71725300  | -3.43402900 |
| H  | -1.44203400 | 4.85934900  | -2.46808100 |
| H  | 0.03835700  | 5.14343200  | -3.39244000 |
| H  | 0.34832700  | 5.63291500  | -0.93635400 |
| H  | 1.45139400  | 4.37330000  | -1.49963500 |
| H  | -4.96960700 | 2.17677100  | 1.07815000  |
| H  | -4.53805600 | 0.51263800  | 2.91311000  |
| H  | -3.99761300 | -0.70326800 | 1.75428300  |
| H  | -3.85149900 | -0.03615700 | -0.82542000 |
| H  | -4.28710600 | 1.62098100  | -1.28192500 |
| H  | -6.82945500 | 0.52822400  | 1.92503800  |
| H  | -6.37558400 | -1.12254000 | 2.35994800  |
| H  | -7.44133500 | -1.01690700 | 0.07893400  |
| H  | -5.79621000 | -1.66053200 | 0.00546200  |
| H  | -6.66999600 | 1.22555200  | -0.66610200 |
| H  | -6.13064800 | -0.00251500 | -1.81651200 |

Molecule 3 – IM2

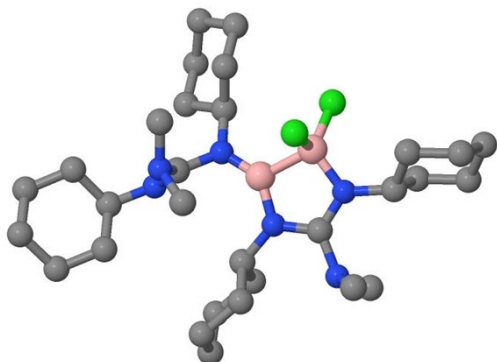

Energy:-198.05 kcal/mol

|    |             |             |             |
|----|-------------|-------------|-------------|
| C  | 1.91546700  | 1.46507400  | 0.01805900  |
| N  | 0.57905100  | 1.16816600  | 0.09374800  |
| N  | 2.73827900  | 0.40716000  | -0.10297800 |
| C  | 4.19978500  | 0.47833100  | -0.16029100 |
| C  | 4.75956300  | -0.42148900 | -1.28148900 |
| C  | 4.80859500  | 0.07475900  | 1.20174300  |
| C  | 6.32784800  | 0.26269100  | 1.13732500  |
| C  | 6.92016200  | -0.59212400 | 0.00783100  |
| C  | 6.28096800  | -0.23958500 | -1.34237000 |
| C  | -0.46754400 | 2.14256900  | 0.42764600  |
| C  | -0.51183700 | 3.36785600  | -0.50808100 |
| C  | -0.35100200 | 2.60874800  | 1.89572100  |
| C  | -1.75983400 | 4.19404600  | -0.17605400 |
| C  | -1.72883700 | 4.64020100  | 1.29330500  |
| C  | -1.59320100 | 3.43904900  | 2.23985500  |
| B  | 0.31208000  | -0.28950000 | 0.05254000  |
| B  | 1.93167300  | -0.89257900 | -0.27976500 |
| Cl | 2.56541000  | -2.31980700 | 0.57516900  |
| N  | -2.40487000 | -0.56982600 | -1.67073700 |
| C  | -2.20930700 | -1.83421500 | -2.40486800 |
| C  | -1.72901300 | 0.54594300  | -2.36188900 |
| H  | 4.51798000  | 1.53182700  | -0.38916600 |
| H  | 4.29580700  | -0.17073300 | -2.25304600 |
| H  | 4.51841600  | -1.48859600 | -1.10233000 |
| H  | 4.57273800  | -0.98180000 | 1.43914600  |
| H  | 4.36635500  | 0.66545000  | 2.02058600  |
| H  | 6.78268900  | -0.02218000 | 2.10429500  |
| H  | 6.58278300  | 1.32631500  | 0.98451700  |
| H  | 6.75545500  | -1.66522600 | 0.22812900  |
| H  | 8.01450000  | -0.45338600 | -0.04087000 |
| H  | 6.70028400  | -0.88398500 | -2.13801400 |
| H  | 6.53636500  | 0.79658200  | -1.62700300 |
| H  | -1.45417400 | 1.60232200  | 0.32598800  |
| H  | -0.50849400 | 3.05485700  | -1.56500100 |
| H  | 0.38769700  | 3.99782300  | -0.37019700 |
| H  | 0.56545700  | 3.20500200  | 2.04125600  |
| H  | -0.27411400 | 1.73342300  | 2.56812000  |
| H  | -2.67733800 | 3.60996500  | -0.37839800 |
| H  | -1.81316900 | 5.07738400  | -0.83777800 |
| H  | -2.64342500 | 5.21025800  | 1.53484400  |
| H  | -0.88403600 | 5.33587000  | 1.45217000  |
| H  | -2.49860400 | 2.80306000  | 2.18313500  |
| H  | -1.53546100 | 3.78681400  | 3.28670000  |
| H  | -1.14984900 | -2.11481700 | -2.54158900 |
| H  | -2.66934000 | -1.73254900 | -3.40249300 |
| H  | -2.73334500 | -2.64961000 | -1.87992500 |
| H  | -2.17798000 | 0.65500400  | -3.36416600 |
| H  | -0.64201700 | 0.41157100  | -2.49114600 |
| H  | -1.90791700 | 1.48566200  | -1.81595900 |

|    |             |             |             |
|----|-------------|-------------|-------------|
| N  | 2.32059900  | 2.84268600  | 0.06988900  |
| C  | 2.86190700  | 3.32126100  | -1.21715100 |
| C  | 3.16842800  | 3.17537800  | 1.22830500  |
| H  | 2.87620300  | 4.42545100  | -1.19309300 |
| H  | 2.18920100  | 3.01407700  | -2.03953300 |
| H  | 3.87706700  | 2.96644600  | -1.45474700 |
| H  | 2.80940500  | 2.64720500  | 2.12982800  |
| H  | 3.06389600  | 4.26025800  | 1.41680000  |
| H  | 4.23856200  | 2.95010800  | 1.09908400  |
| Cl | 1.61195600  | -1.18446900 | -2.05580600 |
| C  | -2.09660500 | -0.65240400 | -0.25471000 |
| N  | -2.92555800 | -0.35012800 | 0.67459400  |
| N  | -0.78599800 | -1.11206600 | 0.13747100  |
| C  | -0.67727900 | -2.46469100 | 0.73768900  |
| C  | -0.44387200 | -3.57164600 | -0.31012100 |
| C  | -1.90617700 | -2.84467600 | 1.59448100  |
| C  | -1.60240900 | -4.15219900 | 2.33603800  |
| C  | -1.27252600 | -5.27874000 | 1.34641800  |
| C  | -0.10988600 | -4.87364600 | 0.42993400  |
| C  | -4.30787300 | 0.07331700  | 0.52986800  |
| C  | -5.16904400 | -0.96695300 | -0.22171400 |
| C  | -4.43270400 | 1.45376000  | -0.15099500 |
| C  | -6.63291700 | -0.51721100 | -0.22826500 |
| C  | -6.76805500 | 0.86398300  | -0.88479700 |
| C  | -5.89858900 | 1.89760300  | -0.15501200 |
| H  | 0.20472600  | -2.44205100 | 1.44307700  |
| H  | 0.37843000  | -3.30851500 | -0.99973800 |
| H  | -1.33993000 | -3.71841400 | -0.93467700 |
| H  | -2.80796200 | -2.95951700 | 0.96956400  |
| H  | -2.13501900 | -2.03460200 | 2.31531300  |
| H  | -2.46630600 | -4.43695500 | 2.96238400  |
| H  | -0.75617900 | -4.00379300 | 3.03346500  |
| H  | -2.16443200 | -5.51825800 | 0.73912200  |
| H  | -1.01956200 | -6.20285000 | 1.89486000  |
| H  | 0.10398700  | -5.67618900 | -0.29777800 |
| H  | 0.81878800  | -4.74649900 | 1.01946600  |
| H  | -4.68311600 | 0.15742300  | 1.59000900  |
| H  | -5.06711200 | -1.95722800 | 0.25461000  |
| H  | -4.79847900 | -1.07925700 | -1.26009000 |
| H  | -4.05203600 | 1.39361000  | -1.18866400 |
| H  | -3.80538600 | 2.19180100  | 0.38111500  |
| H  | -7.02778400 | -0.48649700 | 0.80396700  |
| H  | -7.25182500 | -1.25574500 | -0.76937100 |
| H  | -7.82427700 | 1.18470300  | -0.88393900 |
| H  | -6.46498800 | 0.80339300  | -1.94727700 |
| H  | -6.25955100 | 2.03214100  | 0.88135900  |
| H  | -5.99338500 | 2.88467600  | -0.64234200 |

Molecule 3 – TS3

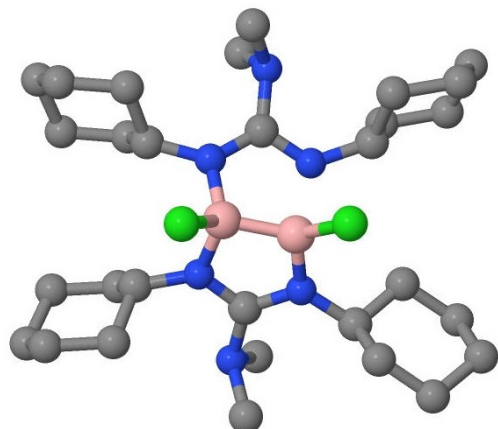

Energy:-187.45 kcal/mol

|    |             |             |             |
|----|-------------|-------------|-------------|
| C  | -0.21514500 | -2.04977700 | -0.23844100 |
| N  | -1.24941900 | -1.27424400 | 0.14921100  |
| N  | 1.05853000  | -1.63302900 | 0.11137000  |
| C  | 2.28343700  | -2.41929300 | -0.18398100 |
| C  | 2.78047600  | -3.17575600 | 1.06715800  |
| C  | 3.38789000  | -1.51232700 | -0.75747700 |
| C  | 4.63844300  | -2.33635700 | -1.08665700 |
| C  | 5.12697000  | -3.13591200 | 0.12973700  |
| C  | 4.01139200  | -4.01817600 | 0.70917100  |
| C  | -2.69976800 | -1.53733600 | -0.00935000 |
| C  | -3.16980900 | -2.79659600 | 0.74359700  |
| C  | -3.13317500 | -1.58148200 | -1.48856200 |
| C  | -4.70020500 | -2.88904500 | 0.66733900  |
| C  | -5.19591100 | -2.87539800 | -0.78674500 |
| C  | -4.66381000 | -1.66081000 | -1.56201700 |
| B  | -0.72043000 | -0.04278500 | 0.95781100  |
| B  | 0.93245400  | -0.36812000 | 0.94783100  |
| Cl | 2.10133200  | -0.12745700 | 2.27683500  |
| N  | 0.28156300  | 3.40687800  | -0.38135000 |
| C  | -0.03110400 | 4.33444000  | 0.73678500  |
| C  | -0.30513400 | 3.81706300  | -1.67910000 |
| H  | 2.04990000  | -3.18519300 | -0.97929800 |
| H  | 1.97844100  | -3.80455300 | 1.49026400  |
| H  | 3.04599900  | -2.46430500 | 1.87548800  |
| H  | 3.64047600  | -0.70382500 | -0.02790300 |
| H  | 3.02009900  | -0.98856700 | -1.66005000 |
| H  | 5.44250600  | -1.66144600 | -1.43752600 |
| H  | 4.42989500  | -3.02364900 | -1.92824200 |
| H  | 5.48783000  | -2.43749100 | 0.91092800  |
| H  | 5.99587200  | -3.75864000 | -0.15097100 |
| H  | 4.37846100  | -4.54093100 | 1.61305500  |
| H  | 3.74115200  | -4.81072100 | -0.01282200 |
| H  | -3.20920200 | -0.64179100 | 0.48006100  |
| H  | -2.83782400 | -2.74174300 | 1.80021900  |
| H  | -2.71459300 | -3.70473400 | 0.30982900  |
| H  | -2.68269300 | -2.45426800 | -1.99764300 |
| H  | -2.76616400 | -0.67621600 | -2.01720000 |
| H  | -5.15453100 | -2.04954100 | 1.22908500  |
| H  | -5.04270600 | -3.81104900 | 1.17310900  |
| H  | -6.30131800 | -2.87894200 | -0.80603600 |
| H  | -4.87539200 | -3.80575700 | -1.29433600 |
| H  | -5.10558200 | -0.72427200 | -1.15641200 |
| H  | -4.98668000 | -1.71810300 | -2.61775600 |
| H  | -1.08906000 | 4.65839800  | 0.78149500  |
| H  | 0.60036700  | 5.23153000  | 0.61619600  |
| H  | 0.22433200  | 3.86978600  | 1.70564200  |

|    |             |             |             |
|----|-------------|-------------|-------------|
| H  | 0.07721700  | 4.82046100  | -1.93267600 |
| H  | -1.41332600 | 3.85406800  | -1.69866900 |
| H  | 0.03329700  | 3.12327500  | -2.46729900 |
| N  | -0.52288500 | -3.26014600 | -1.00692600 |
| C  | -0.19119900 | -4.51506000 | -0.27521100 |
| C  | 0.04585200  | -3.22361700 | -2.38394400 |
| H  | -0.78017000 | -5.33256500 | -0.72742500 |
| H  | -0.50213700 | -4.42979600 | 0.78128400  |
| H  | 0.87198300  | -4.80164000 | -0.29765600 |
| H  | -0.22048700 | -2.26871400 | -2.86828700 |
| H  | -0.41726400 | -4.03542200 | -2.96999500 |
| H  | 1.14453100  | -3.33981400 | -2.42850800 |
| Cl | -1.59734500 | -0.13529500 | 2.68473500  |
| C  | 0.16376900  | 1.98501900  | -0.04436400 |
| N  | 1.27988500  | 1.25093000  | -0.10487000 |
| N  | -0.99724800 | 1.33068600  | 0.33696400  |
| C  | -2.42001600 | 1.71664900  | 0.22110800  |
| C  | -2.89778900 | 1.86648300  | -1.23992400 |
| C  | -2.84961900 | 2.92483000  | 1.07190400  |
| C  | -4.37943100 | 3.05001400  | 1.04368800  |
| C  | -4.91181000 | 3.15653400  | -0.39311600 |
| C  | -4.42685100 | 1.99389100  | -1.27151200 |
| C  | 2.66795000  | 1.72316600  | -0.26898000 |
| C  | 3.11575800  | 2.80851200  | 0.73338100  |
| C  | 2.94825300  | 2.18861900  | -1.71658900 |
| C  | 4.61815700  | 3.07332400  | 0.56700200  |
| C  | 4.95426000  | 3.49057800  | -0.87294800 |
| C  | 4.44853400  | 2.45914100  | -1.89344600 |
| H  | -2.99977500 | 0.82734100  | 0.64990900  |
| H  | -2.57389000 | 0.98522300  | -1.83436500 |
| H  | -2.44325300 | 2.75726500  | -1.71834200 |
| H  | -2.39399900 | 3.86596400  | 0.70426500  |
| H  | -2.49369900 | 2.78034600  | 2.11299300  |
| H  | -4.69196500 | 3.93508400  | 1.62852600  |
| H  | -4.83538600 | 2.17729700  | 1.55173200  |
| H  | -4.58869300 | 4.11714200  | -0.83778200 |
| H  | -6.01742200 | 3.18162200  | -0.38140000 |
| H  | -4.76869300 | 2.14228200  | -2.31264200 |
| H  | -4.88983200 | 1.04025700  | -0.93413200 |
| H  | 3.29628800  | 0.79979900  | -0.06353800 |
| H  | 2.88929000  | 2.48535200  | 1.76683600  |
| H  | 2.55237200  | 3.74450500  | 0.56723700  |
| H  | 2.37148600  | 3.10829500  | -1.93117400 |
| H  | 2.60312100  | 1.42725700  | -2.43656000 |
| H  | 5.19319100  | 2.16863100  | 0.84261500  |
| H  | 4.93786900  | 3.86266800  | 1.27219200  |
| H  | 6.04581200  | 3.62441500  | -0.98177100 |
| H  | 4.49844000  | 4.47637600  | -1.08709700 |
| H  | 5.01678000  | 1.51572500  | -1.78427700 |
| H  | 4.64566300  | 2.81920400  | -2.91988500 |

### Molecule 3 – Product

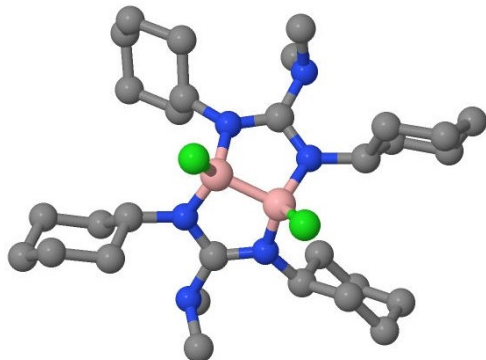

Energy: -220.97 kcal/mol

|    |             |             |             |
|----|-------------|-------------|-------------|
| C  | 0.92696400  | 1.84337600  | -0.10395500 |
| N  | 1.68901500  | 0.82196200  | 0.33594100  |
| N  | -0.41377700 | 1.71872100  | 0.05624800  |
| C  | -1.38923800 | 2.55657400  | -0.63898500 |
| C  | -2.59316000 | 2.89778300  | 0.26182700  |
| C  | -1.86461400 | 1.84547100  | -1.92921800 |
| C  | -2.84204500 | 2.74835100  | -2.68583800 |
| C  | -4.03430900 | 3.11740900  | -1.79230700 |
| C  | -3.55698200 | 3.80756100  | -0.50743000 |
| C  | 3.14250900  | 0.83091500  | 0.51714100  |
| C  | 3.58906400  | 1.88330700  | 1.55508200  |
| C  | 3.90914900  | 1.03378800  | -0.80796100 |
| C  | 5.08916700  | 1.71341300  | 1.81737400  |
| C  | 5.88826200  | 1.85635200  | 0.51378700  |
| C  | 5.40691400  | 0.84670900  | -0.53927400 |
| B  | 0.84364900  | -0.27293300 | 1.03568200  |
| B  | -0.78271900 | 0.49305700  | 0.93197900  |
| Cl | -1.41088800 | 1.00990500  | 2.53469300  |
| N  | -1.44262700 | -2.97056400 | -0.35929500 |
| C  | -1.34056100 | -4.05700500 | 0.63191100  |
| C  | -1.22249700 | -3.39139700 | -1.74807700 |
| H  | -0.91452400 | 3.53205000  | -0.93193000 |
| H  | -2.25021000 | 3.38341300  | 1.19451800  |
| H  | -3.12752100 | 1.97812300  | 0.58207200  |
| H  | -2.35207700 | 0.88487800  | -1.67096800 |
| H  | -1.00285200 | 1.57730000  | -2.56260700 |
| H  | -3.19797600 | 2.23689700  | -3.59893500 |
| H  | -2.33095700 | 3.66449500  | -3.03230100 |
| H  | -4.60637000 | 2.20467600  | -1.53674500 |
| H  | -4.73271900 | 3.77298300  | -2.34101600 |
| H  | -4.42321700 | 4.05945400  | 0.13220000  |
| H  | -3.07129200 | 4.76965700  | -0.74919900 |
| H  | 3.42428600  | -0.18937100 | 0.91598200  |
| H  | 3.01300600  | 1.75995800  | 2.49293700  |
| H  | 3.37444900  | 2.90141800  | 1.18722400  |
| H  | 3.72389500  | 2.04679400  | -1.21017600 |
| H  | 3.55315200  | 0.32257800  | -1.57154200 |
| H  | 5.28330400  | 0.72533300  | 2.27645000  |
| H  | 5.42992600  | 2.46204700  | 2.55471800  |
| H  | 6.96513600  | 1.71587100  | 0.71066500  |
| H  | 5.78037400  | 2.88438000  | 0.12104100  |
| H  | 5.60978100  | -0.18456100 | -0.19588100 |
| H  | 5.97774400  | 0.97502800  | -1.47572000 |
| H  | -0.61087100 | -4.83979100 | 0.37802700  |
| H  | -2.33862000 | -4.53063400 | 0.70004900  |
| H  | -1.08447200 | -3.66303100 | 1.63321000  |
| H  | -2.02580300 | -4.10119200 | -2.01966600 |
| H  | -0.25467400 | -3.88495800 | -1.93674000 |
| H  | -1.31187200 | -2.51816000 | -2.41872600 |



|    |             |             |             |
|----|-------------|-------------|-------------|
| N  | 1.59198600  | 2.98288500  | -0.68686200 |
| C  | 1.32242600  | 4.24035600  | 0.03469000  |
| C  | 1.41985500  | 3.08847700  | -2.14616800 |
| H  | 2.16713600  | 4.92564800  | -0.15893100 |
| H  | 1.28580700  | 4.05180200  | 1.12452800  |
| H  | 0.38885000  | 4.74851900  | -0.25206900 |
| H  | 1.56723200  | 2.09742200  | -2.61095500 |
| H  | 2.20875300  | 3.75837100  | -2.53363900 |
| H  | 0.44481300  | 3.48323500  | -2.47149100 |
| Cl | 1.41515500  | -0.67480400 | 2.68738200  |
| C  | -0.77922200 | -1.76186900 | 0.04494300  |
| N  | -1.56745300 | -0.69449500 | 0.30413500  |
| N  | 0.54818900  | -1.58424100 | 0.25238800  |
| C  | 1.70397700  | -2.27201500 | -0.30901600 |
| C  | 1.85471700  | -1.98158700 | -1.82121800 |
| C  | 1.76798600  | -3.78548200 | -0.03058600 |
| C  | 3.12626400  | -4.31377200 | -0.50967900 |
| C  | 3.30949300  | -4.03766500 | -2.00857500 |
| C  | 3.19862100  | -2.53581300 | -2.30572100 |
| C  | -3.02849100 | -0.69493200 | 0.42086500  |
| C  | -3.52819500 | -1.50982700 | 1.63302800  |
| C  | -3.75191700 | -1.17683100 | -0.85624900 |
| C  | -5.03050800 | -1.25784000 | 1.80460200  |
| C  | -5.79765400 | -1.64980500 | 0.53327000  |
| C  | -5.25202800 | -0.90348700 | -0.69362800 |
| H  | 2.61173500  | -1.82539600 | 0.20945300  |
| H  | 1.79908000  | -0.88988500 | -1.99662500 |
| H  | 1.02705300  | -2.41979700 | -2.39854100 |
| H  | 0.96162400  | -4.32888900 | -0.54841300 |
| H  | 1.63918800  | -3.96849000 | 1.05345200  |
| H  | 3.20236800  | -5.39762700 | -0.31019000 |
| H  | 3.94483200  | -3.84254300 | 0.06733900  |
| H  | 2.55212700  | -4.59414700 | -2.58984800 |
| H  | 4.28979800  | -4.41892900 | -2.34668400 |
| H  | 3.31420200  | -2.35416600 | -3.38940100 |
| H  | 4.03130600  | -1.99358900 | -1.81659400 |
| H  | -3.32689300 | 0.38921200  | 0.58253400  |
| H  | -2.97919300 | -1.21938000 | 2.54949900  |
| H  | -3.33069500 | -2.58423800 | 1.48249800  |
| H  | -3.58261900 | -2.25806700 | -1.01403300 |
| H  | -3.35153800 | -0.66703300 | -1.74860000 |
| H  | -5.20935500 | -0.19234400 | 2.04413200  |
| H  | -5.41182200 | -1.83014200 | 2.66906300  |
| H  | -6.87364200 | -1.43776000 | 0.65849500  |
| H  | -5.71726200 | -2.74056900 | 0.37085400  |
| H  | -5.43578700 | 0.18193400  | -0.58988700 |
| H  | -5.79432800 | -1.21909300 | -1.60218100 |

## References

- 1 R. J. Brotherton, A. L. McCloskey, L. L. Petterson, H. Steinberg, *J. Am. Chem. Soc.*, 1960, **24**, 6242-6245.
- 2 H. Nöth, W. Meister, *Chem. Ber.* **1961**, *94*, 509-514.
- 3 H. Hommer, H. Nöth, J. Knizek, W. Ponikwar, H. Schwenk-Kircher, *Eur. J. Inorg. Chem.*, **1998**, 1519-1527.
- 4 O. D. Rigaku, 2015, CrysAlis PRO. Rigaku Oxford Diffraction Ltd, Yarnton, Oxfordshire, England.
- 5 O. V. Dolomanov, L. J. Bourhis, R. J. Gildea, J. A. K. Howard, H. Puschmann, *J. Appl. Cryst.*, 2009, **42**, 339-341.
- 6 a) G. M. Sheldrick, *Acta Cryst.*, 2015, **A71**, 3-8; b) G. M. Sheldrick, *Acta Cryst.*, 2015, **C71**, 3-8.
- 7 a) F. Neese, *Rev. Comput. Mol. Sci.*, 2012, **2**, 73-78; b) F. Neese, *Rev. Comput. Mol. Sci.*, 2018, **8**, e1327.
- 8 Y. Zhao, D. G. Truhlar, *Theor. Chem. Acc.*, 2008, **120**, 215-41.
- 9 J. P. Blaudeau, M. P. McGrath, L. A. Curtiss, L. Radom, *J. Chem. Phys.*, 1997, **107**, 5016-5021.
- 10 G. A. Petersson, M. A. Al-Laham, *J. Chem. Phys.*, 1991, **94**, 6081-6090.
- 11 R. Ditchfield, *J. Chem. Phys.*, 1972, **56**, 2257-2261.
- 12 K. Wolinski, J. F. Hinton, P. Pulay, *J. Am. Chem. Soc.*, 1990, **112**, 8251-8260.
- 13 a) J. J. P. Stewart, *J. Mol. Model*, 2017, **23**, 154; b) J. J. P. Stewart, 2020, Stewart Computational Chemistry, MOPAC2016, Version: 20.015L.
- 14 E. D. Glendening, J. K. Badenhoop, A. E. Reed, J. E. Carpenter, J. A. Bohmann, C. M. Morales, C. R. Landis, and F. Weinhold (Theoretical Chemistry Institute, University of Wisconsin, Madison, WI, 2013, NBO 6.0 Program.
